# Supplementary material for: DE-PASS Best Evidence Statement (BESt): modifiable determinants of physical activity and sedentary behaviour in children and adolescents aged 5–19 years–a protocol for systematic review and meta-analysis
Source: PubMed Central journal article supplement — BMJ Open. 2022 Sep 20;12(9):e059202. doi: 10.1136/bmjopen-2021-059202 (PMC9490573; doi:10.1136/bmjopen-2021-059202), 2022-09-20
Supplement: bmjopen-2021-059202.draft_revisions.pdf [file bmjopen-2021-059202.draft_revisions.pdf]

# BMJ Open

BMJ Open is committed to open peer review. As part of this commitment we make the peer review history of every article we publish publicly available.

When an article is published we post the peer reviewers' comments and the authors' responses online. We also post the versions of the paper that were used during peer review. These are the versions that the peer review comments apply to.

The versions of the paper that follow are the versions that were submitted during the peer review process. They are not the versions of record or the final published versions. They should not be cited or distributed as the published version of this manuscript.

BMJ Open is an open access journal and the full, final, typeset and author-corrected version of record of the manuscript is available on our site with no access controls, subscription charges or pay-per-view fees (<http://bmjopen.bmj.com>).

If you have any questions on BMJ Open's open peer review process please email [info.bmjopen@bmj.com](mailto:info.bmjopen@bmj.com)

# BMJ Open

## DE-PASS Best Evidence Statement (BEST) – Modifiable determinants of physical activity and sedentary behaviour in children and adolescents aged 5-19 years: A systematic review protocol

|                               |                                                                                                                                                                                                                                                                                                                                                                                                                                                                                                                                                                                                                                                                                                                                                                                                                                                                                                                                                                                                                                                                                                                                                                                                                                                                                                                                                                                                                                                                                                                                                                                                                                                                                                                                                                                                                                                                                                                                                                                                                                                                                                                                                                                                                                   |
|-------------------------------|-----------------------------------------------------------------------------------------------------------------------------------------------------------------------------------------------------------------------------------------------------------------------------------------------------------------------------------------------------------------------------------------------------------------------------------------------------------------------------------------------------------------------------------------------------------------------------------------------------------------------------------------------------------------------------------------------------------------------------------------------------------------------------------------------------------------------------------------------------------------------------------------------------------------------------------------------------------------------------------------------------------------------------------------------------------------------------------------------------------------------------------------------------------------------------------------------------------------------------------------------------------------------------------------------------------------------------------------------------------------------------------------------------------------------------------------------------------------------------------------------------------------------------------------------------------------------------------------------------------------------------------------------------------------------------------------------------------------------------------------------------------------------------------------------------------------------------------------------------------------------------------------------------------------------------------------------------------------------------------------------------------------------------------------------------------------------------------------------------------------------------------------------------------------------------------------------------------------------------------|
| Journal:                      | <i>BMJ Open</i>                                                                                                                                                                                                                                                                                                                                                                                                                                                                                                                                                                                                                                                                                                                                                                                                                                                                                                                                                                                                                                                                                                                                                                                                                                                                                                                                                                                                                                                                                                                                                                                                                                                                                                                                                                                                                                                                                                                                                                                                                                                                                                                                                                                                                   |
| Manuscript ID                 | bmjopen-2021-059202                                                                                                                                                                                                                                                                                                                                                                                                                                                                                                                                                                                                                                                                                                                                                                                                                                                                                                                                                                                                                                                                                                                                                                                                                                                                                                                                                                                                                                                                                                                                                                                                                                                                                                                                                                                                                                                                                                                                                                                                                                                                                                                                                                                                               |
| Article Type:                 | Protocol                                                                                                                                                                                                                                                                                                                                                                                                                                                                                                                                                                                                                                                                                                                                                                                                                                                                                                                                                                                                                                                                                                                                                                                                                                                                                                                                                                                                                                                                                                                                                                                                                                                                                                                                                                                                                                                                                                                                                                                                                                                                                                                                                                                                                          |
| Date Submitted by the Author: | 16-Nov-2021                                                                                                                                                                                                                                                                                                                                                                                                                                                                                                                                                                                                                                                                                                                                                                                                                                                                                                                                                                                                                                                                                                                                                                                                                                                                                                                                                                                                                                                                                                                                                                                                                                                                                                                                                                                                                                                                                                                                                                                                                                                                                                                                                                                                                       |
| Complete List of Authors:     | <p>Khudair, Mohammed; Northumbria University - City Campus, Sport, Exercise and Rehabilitation</p> <p>Marcuzzi, Anna; Norwegian University of Science and Technology, Public Health and Nursing</p> <p>Ng, Kwok; University of Eastern Finland, School of Educational Sciences and Psychology; University of Limerick, Department of Physical Education and Sport Sciences</p> <p>Tempest, Gavin; Northumbria University Faculty of Health and Life Sciences, Sport, Exercise and Rehabilitation</p> <p>Bartoš, František; University of Amsterdam, Department of Psychology</p> <p>Peric, Ratko; Exercise Physiology Laboratory, OrthoSport Banja Luka</p> <p>Maier, Maximilian; University College London</p> <p>Beccia, Flavia; Università Cattolica del Sacro Cuore Facoltà di Psicologia</p> <p>Castagna, Carolina; Università Cattolica del Sacro Cuore Facoltà di Psicologia</p> <p>Chaabene, Helmi; University of Potsdam Faculty of Human Sciences; University of Jendouba</p> <p>Chalkley, Anna; Western Norway University of Applied Sciences Faculty of Education; University of Bradford Faculty of Health Studies</p> <p>Ciaffaroni, Simone; University of Rome 'Foro Italico'</p> <p>Cieślińska-Świder, Joanna; The Jerzy Kukuczka Academy of Physical Education in Katowice Poland</p> <p>Čingienė, Vilma; Mykolas Romeris University</p> <p>Cortis, Cristina; University of Cassino and Lazio Meridionale</p> <p>Corvino, Chiara; Università Cattolica del Sacro Cuore Facoltà di Psicologia</p> <p>Di Baldassarre, Angela; Gabriele d'Annunzio University of Chieti and Pescara</p> <p>Di Credico, Andrea; Gabriele d'Annunzio University of Chieti and Pescara</p> <p>Drid, Patrik; University of Novi Sad</p> <p>Fernández Tarazaga, Rosa M<sup>a</sup>; Fundación para la Formación e Investigación Sanitarias de la Región de Murcia</p> <p>García Sánchez, Esther; Fundación para la Formación e Investigación Sanitarias de la Región de Murcia</p> <p>Ghinassi, Barbara; Gabriele d'Annunzio University of Chieti and Pescara</p> <p>Goudas, Marios; University of Thessaly</p> <p>Hayes, Grainne; Technological University of the Shannon: Midlands Midwest, Moylish Campus; University of Limerick</p> |

1  
2  
3  
4  
5  
6  
7  
8  
9  
10  
11  
12  
13  
14  
15  
16  
17  
18  
19  
20  
21  
22  
23  
24  
25  
26  
27  
28  
29  
30  
31  
32  
33  
34  
35  
36  
37  
38  
39  
40  
41  
42  
43  
44  
45  
46  
47  
48  
49  
50  
51  
52  
53  
54  
55  
56  
57  
58  
59  
60

|  |                                                                                                                                                                                                                                                                                                                                                                                                                                                                                                                                                                                                                                                                                                                                                                                                                                                                                                                                                                                                                                                                                                                                                                                                                                                                                                                                                                                                                                                                                                                                                                                                                                                                                                                                                                                                                                                                                                                                                                                                                                                                                                                                                                                                                                                                                                                                                                                                                                                                                                                                                                                                                                                                                                                                                                                                                                                                                                                                                                                                                                                                                                                                                                                                                                                                                                                                                                         |
|--|-------------------------------------------------------------------------------------------------------------------------------------------------------------------------------------------------------------------------------------------------------------------------------------------------------------------------------------------------------------------------------------------------------------------------------------------------------------------------------------------------------------------------------------------------------------------------------------------------------------------------------------------------------------------------------------------------------------------------------------------------------------------------------------------------------------------------------------------------------------------------------------------------------------------------------------------------------------------------------------------------------------------------------------------------------------------------------------------------------------------------------------------------------------------------------------------------------------------------------------------------------------------------------------------------------------------------------------------------------------------------------------------------------------------------------------------------------------------------------------------------------------------------------------------------------------------------------------------------------------------------------------------------------------------------------------------------------------------------------------------------------------------------------------------------------------------------------------------------------------------------------------------------------------------------------------------------------------------------------------------------------------------------------------------------------------------------------------------------------------------------------------------------------------------------------------------------------------------------------------------------------------------------------------------------------------------------------------------------------------------------------------------------------------------------------------------------------------------------------------------------------------------------------------------------------------------------------------------------------------------------------------------------------------------------------------------------------------------------------------------------------------------------------------------------------------------------------------------------------------------------------------------------------------------------------------------------------------------------------------------------------------------------------------------------------------------------------------------------------------------------------------------------------------------------------------------------------------------------------------------------------------------------------------------------------------------------------------------------------------------------|
|  | <p>Honorio, Samuel; Polytechnic Institute of Castelo Branco<br/>Izzicupo, Pascal; Gabriele d'Annunzio University of Chieti and Pescara<br/>Department of Sciences<br/>Jahre, Henriette; Oslo Metropolitan University<br/>Juric, Petra; University of Zagreb<br/>Kolovelonis, Athanasios; University of Thessaly<br/>Kongsvold, Atle; Norwegian University of Science and Technology, Public<br/>Health and Nursing<br/>Kouidi, Evangelia; Aristotle University of Thessaloniki<br/>Mansergh, Fiona; Department of Health, Health and Wellbeing<br/>Programme<br/>Masanovic, Bojan; University of Montenegro; Montenegrosport<br/>Mekonnen, Teferi; University of Oslo<br/>O'Hara, Kelly; University of Beira Interior<br/>Torun, Ayse Ozbil; Northumbria University - City Campus, Sport,<br/>Exercise and Rehabilitation<br/>Palumbo, Federico; University of Rome 'Foro Italico'<br/>Popovic, Stevo; University of Montenegro; Western Balkan Sport<br/>Innovation Lab<br/>Prieske, Olaf; University of Applied Sciences for Sport and Management<br/>Potsdam<br/>Puharic, Zrinka; Bjelovar University of Applied Sciences<br/>Sandu, Petru; National Institute of Public Health in Romania<br/>Sorić, Maroje; University of Zagreb<br/>Stavnsbo, Mette; University of Agder<br/>Syrmpas, Ioannis; University of Thessaly<br/>Van Hoye, Aurélie; University of Limerick<br/>Wunsch, Kathrin; Karlsruhe Institute of Technology<br/>Boccia, S; Università Cattolica del Sacro Cuore Facoltà di Medicina e<br/>Chirurgia, Section of Hygiene, University Department of Life Sciences<br/>and Public Health; Fondazione Policlinico Universitario Agostino Gemelli<br/>IRCCS, Department of Woman and Child Health and Public Health -<br/>Public Health Area<br/>Brandes, Mirko; Leibniz Institute for Prevention Research and<br/>Epidemiology, Prevention and Evaluation<br/>Cardon, Greet; Ghent University, Movement and Sports Sciences<br/>Carlin, Angela; University of Ulster, School of Sport<br/>de Geus, Eco; VU University Amsterdam, Biological Psychology; VU<br/>University Medical Center, EMGO+ Institute of Health and Care Research<br/>Gallè, Francesca; University of Naples - Parthenope, Department of<br/>Movement Sciences and Wellbeing<br/>Gebremariam, Mekdes ; Universitetet i Oslo Det medisinske fakultet,<br/>Nutrition<br/>Jelsma, Judith; Amsterdam UMC - Locatie VUMC, Public and Occupational<br/>Health<br/>Mork, Paul Jarle; Norges teknisk-naturvitenskapelige universitet,<br/>Department of Public Health and Nursing<br/>Murphy, Marie; University of Ulster, Sport and Exercise Science<br/>Ribeiro, José Carlos; Faculty of Sports - University of Porto, Research<br/>Centre in Physical Activity, Health and Leisure<br/>Rumbold, Penny; Northumbria University<br/>van der Ploeg, Hidde; Amsterdam University Medical Centres, Vrije<br/>Universiteit Amsterdam, Department of Public and Occupational Health,<br/>Amsterdam Public Health Institute<br/>Vilela, Sofia; University of Porto Institute of Public Health<br/>Woods, Catherine; University of Limerick, Physical education and sport<br/>sciences<br/>Caprinica, Laura; University of Rome 'Foro Italico'<br/>MacDonncha, Ciaran; University of Limerick, Centre for Physical Activity<br/>and Health Research<br/>Ling, Fiona ; Northumbria University</p> |
|--|-------------------------------------------------------------------------------------------------------------------------------------------------------------------------------------------------------------------------------------------------------------------------------------------------------------------------------------------------------------------------------------------------------------------------------------------------------------------------------------------------------------------------------------------------------------------------------------------------------------------------------------------------------------------------------------------------------------------------------------------------------------------------------------------------------------------------------------------------------------------------------------------------------------------------------------------------------------------------------------------------------------------------------------------------------------------------------------------------------------------------------------------------------------------------------------------------------------------------------------------------------------------------------------------------------------------------------------------------------------------------------------------------------------------------------------------------------------------------------------------------------------------------------------------------------------------------------------------------------------------------------------------------------------------------------------------------------------------------------------------------------------------------------------------------------------------------------------------------------------------------------------------------------------------------------------------------------------------------------------------------------------------------------------------------------------------------------------------------------------------------------------------------------------------------------------------------------------------------------------------------------------------------------------------------------------------------------------------------------------------------------------------------------------------------------------------------------------------------------------------------------------------------------------------------------------------------------------------------------------------------------------------------------------------------------------------------------------------------------------------------------------------------------------------------------------------------------------------------------------------------------------------------------------------------------------------------------------------------------------------------------------------------------------------------------------------------------------------------------------------------------------------------------------------------------------------------------------------------------------------------------------------------------------------------------------------------------------------------------------------------|

|           |                                                                                                                  |
|-----------|------------------------------------------------------------------------------------------------------------------|
| Keywords: | PUBLIC HEALTH, Health policy < HEALTH SERVICES ADMINISTRATION & MANAGEMENT, Community child health < PAEDIATRICS |
|           |                                                                                                                  |

SCHOLARONE™  
Manuscripts

**TITLE**

DE-PASS Best Evidence Statement (BEST) – Modifiable determinants of physical activity and sedentary behaviour in children and adolescents aged 5-19 years: A systematic review protocol

**AUTHORS**

Mohammed Khudair, Anna Marcuzzi, Kwok Ng, Gavin Daniel Tempest, František Bartoš, Ratko Peric, Maximilian Maier, Flavia Beccia, Stefania Boccia, Mirko Brandes, Greet Cardon, Angela Carlin, Carolina Castagna, Helmi Chaabene, Anna Chalkley, Simone Ciaccioni, Joanna Cieślińska-Świder, Vilma Čingienė, Cristina Cortis, Chiara Corvino, Eco de Geus, Angela Di Baldassarre, Andrea Di Credico, Patrik Drid, Rosa M<sup>a</sup> Fernández Tarazaga, Francesca Gallè, Esther García Sánchez, Mekdes Gebremariam, Barbara Ghinassi, Marios Goudas, Grainne Hayes, Samuel Honorio, Pascal Izzicupo, Henriette Jahre, Judith Jelsma, Petra Juric, Athanasios Kolovelonis, Atle Kongsvold, Evangelia Kouidi, Fiona Mansergh, Bojan Masanovic, Teferi Mekonnen, Paul Jarle Mork, Marie Murphy, Kelly O'Hara, Ayse Ozbil Torun, Federico Palumbo, Stevo Popovic, Olaf Prieske, Zrinka Puharic, Jose Ribeiro, Penny Louise Sheena Ruibold, Petru Sandu, Maroje Sorić, Mette Stavnsbo, Ioannis Sympas, Hidde P. Van Der Ploeg, Aurélie Van Hoye, Sofia Vilela, Catherine Woods, Kathrin Wunsch, Laura Capranica, Ciaran MacDonncha, Fiona Chun Man Ling, On behalf of DE-PASS

Mohammed Khudair, [mohammed2.khudair@northumbria.ac.uk](mailto:mohammed2.khudair@northumbria.ac.uk), Department of Sport, Exercise and Rehabilitation, Northumbria University, UK \*Correspondence: Room NBD 431, College Ln, Newcastle upon Tyne NE1 8SG; [mohammed2.khudair@northumbria.ac.uk](mailto:mohammed2.khudair@northumbria.ac.uk)

Anna Marcuzzi, [anna.marcuzzi@ntnu.no](mailto:anna.marcuzzi@ntnu.no), Department of Public Health and Nursing, Norwegian University of Science and Technology (NTNU), Norway

Kwok Ng, [kwok.ng@uef.fi](mailto:kwok.ng@uef.fi), School of Educational Sciences and Psychology, University of Eastern Finland, Finland; Department of Physical Education and Sport Sciences, University of Limerick, Ireland

Gavin Daniel Tempest, [gavin.tempest@northumbria.ac.uk](mailto:gavin.tempest@northumbria.ac.uk), Department of Sport, Exercise and Rehabilitation, Northumbria University, UK

František Bartoš, [f.bartos96@gmail.com](mailto:f.bartos96@gmail.com), Department of Psychology, University of Amsterdam, the Netherlands

Ratko Peric, [ratkoperic@yahoo.com](mailto:ratkoperic@yahoo.com), Exercise Physiology Laboratory, OrthoSport Banja Luka, Bosnia

Maximilian Maier, [maximilianmaier0401@gmail.com](mailto:maximilianmaier0401@gmail.com), University College London, UK

Flavia Beccia, [flavia.beccia@gmail.com](mailto:flavia.beccia@gmail.com), Department of Psychology, Università Cattolica del Sacro Cuore, Italy

Stefania Boccia, [stefania.boccia@unicatt.it](mailto:stefania.boccia@unicatt.it), Department of Psychology, Università Cattolica del Sacro Cuore, Italy

Mirko Brandes, [brandes@leibniz-bips.de](mailto:brandes@leibniz-bips.de), Department of Prevention and Evaluation, Leibniz Institute for Prevention Research and Epidemiology (BIPS), Germany

- 1  
2  
3 36 Greet Cardon, Greet.Cardon@UGent.be, Department of Movement and Sports Sciences, Ghent  
4 37 University, Belgium  
5  
6 38 Angela Carlin, a.carlin1@ulster.ac.uk, Centre for Exercise Medicine, Physical Activity and Health,  
7 39 Sport and Exercise Sciences Research Institute, University of Ulster, Jordanstown Campus, UK  
8  
9 40 Carolina Castagna, carolina.castagna@gmail.com, Department of Psychology, Università Cattolica del  
10 41 Sacro Cuore, Italy  
11  
12 42 Helmi Chaabene, chaabanelmi@hotmail.fr, Department of Sports and Health Sciences, Faculty of  
13 43 Human Sciences, University of Potsdam, Germany; High Institute of Sports and Physical Education of Kef,  
14 44 University of Jendouba, Tunisia  
15  
16 45 Anna Chalkley, Anna.Chalkley@hvl.no, Center for Physically Active Learning, Faculty of Education,  
17 46 Arts and Sports, Western Norway University of Applied Sciences, Norway; Faculty of Health Studies,  
18 47 University of Bradford, UK  
19  
20 48 Simone Ciaccioni, simoneciaccioni@yahoo.it, Department of Movement, Human and Health  
21 49 Sciences, University of Rome "Foro Italico", Italy  
22  
23 50 Joanna Cieślińska-Świder, j.cieslinska-swider@awf.katowice.pl, The Jerzy Kukuczka Academy of  
24 51 Physical Education in Katowice Poland, Department of Physiotherapy, Poland  
25  
26 52 Vilma Čingienė, v.cingiene@mruni.eu, Institute of Leadership and Strategic Management, Faculty of  
27 53 Public Governance and Business, Mykolas Romeris University, Lithuania  
28  
29 54 Cristina Cortis, c.cortis@unicas.it, Department of Human Sciences, Society and Health, University of  
30 55 Cassino and Lazio Meridionale, Italy  
31  
32 56 Chiara Corvino, chiara.corvino1@unicatt.it, Department of Psychology, Università Cattolica del Sacro  
33 57 Cuore, Italy  
34  
35 58 Eco de Geus, eco.de.geus@vu.nl, Department of Biological Psychology Vrije Universiteit Amsterdam,  
36 59 The Netherlands; Amsterdam Public Health research institute, UMC Amsterdam, The Netherlands  
37  
38 60 Angela Di Baldassarre, angela.dibaldassarre@unich.it, Department of Medicine and Aging Sciences,  
39 61 University "G. d'Annunzio" of Chieti-Pescara, Italy  
40  
41 62 Andrea Di Credico, andrea.dicredico@unich.it, Department of Medicine and Aging Sciences,  
42 63 University "G. d'Annunzio" of Chieti-Pescara, Italy  
43  
44 64 Patrik Drid, patrikdrid@gmail.com, Faculty of Sport and Physical Education, University of Novi Sad,  
45 65 Serbia  
46  
47 66 Rosa M<sup>a</sup> Fernández Tarazaga, tarazagarose@gmail.com, Fundación para la Formación e Investigación  
48 67 Sanitarias de la Región de Murcia, Spain  
49  
50 68 Francesca Gallè, francesca.galle@uniparthenope.it, Department of Movement Sciences and  
51 69 Wellbeing, University of Naples Parthenope, Italy  
52  
53 70 Esther García Sánchez, garciasanchezesther10@gmail.com, Fundación para la Formación e  
54 71 Investigación Sanitarias de la Región de Murcia, Spain  
55  
56 72 Mekdes Gebremariam, mekdes.gebremariam@medisin.uio.no, Department of Community Medicine  
57 73 and Global Health, Institute of Health and Society, University of Oslo, Norway  
58  
59  
60

- 1  
2  
3 74 Barbara Ghinassi, b.ghinassi@unich.it, Department of Medicine and Aging Sciences, University "G.  
4 75 d'Annunzio" of Chieti-Pescara, Italy  
5  
6 76 Marios Goudas, mgoudas@pe.uth.gr, Department of Physical Education and Sport Science,  
7 77 University of Thessaly, Greece  
8  
9 78 Grainne Hayes, grainne.hayes@ul.ie, Department of Sport and Early Childhood Studies, Technological  
10 79 University of the Shannon: Midlands Midwest, Moylish Campus, Ireland; Physical Activity for Health  
11 80 Research Cluster, Health Research Institute, University of Limerick, Ireland  
12  
13 81 Samuel Honorio, samuelhonorio@hotmail.com, Polytechnic Institute of Castelo Branco, Portugal  
14  
15 82 Pascal Izzicupo, pascal.izzicupo@unich.it, Department of Medicine and Aging Sciences, University "G.  
16 83 d'Annunzio" of Chieti-Pescara, Italy  
17  
18 84 Henriette Jahre, henriett@oslomet.no, Department of Physiotherapy, Oslo Metropolitan University,  
19 85 Norway  
20  
21 86 Judith Jelsma, j.jelsma@amsterdamumc.nl, Amsterdam UMC, Vrije Universiteit Amsterdam,  
22 87 Department of Public and Occupational Health, Amsterdam Public Health Research Institute, The  
23 88 Netherlands  
24  
25 89 Petra Juric, petra.juric@kif.hr, Faculty of Kinesiology, University of Zagreb, Croatia  
26  
27 90 Athanasios Kolovelonis, akolov@pe.uth.gr, Department of Physical Education and Sport Science,  
28 91 University of Thessaly, Greece  
29  
30 92 Atle Kongs vold, atle.m.kongs vold@ntnu.no, Department of Public Health and Nursing, Norwegian  
31 93 University of Science and Technology (NTNU), Norway  
32  
33 94 Evangelia Kouidi, kouidi@phed.auth.gr, Laboratory of Sports Medicine, Department of Physical  
34 95 Education and Sports Science, Aristotle University of Thessaloniki, Greece  
35  
36 96 Fiona Mansergh, Fiona\_Mansergh@health.gov.ie, Health and Wellbeing Programme, Department of  
37 97 Health, Ireland  
38  
39 98 Bojan Masanovic, bojanma@ucg.ac.me, Faculty for Sport and Physical Education, University of  
40 99 Montenegro, Montenegro; Montenegrosport, Montenegro; Montenegrin Sports Academy,  
41 100 Montenegro  
42  
43 101 Teferi Mekonnen, t.m.yitayew@medisin.uio.no, Department of Nutrition, Institute of Basic Medical  
44 102 Sciences, Faculty of Medicine, University of Oslo, Norway  
45  
46 103 Paul Jarle Mork, paul.mork@ntnu.no, Department of Public Health and Nursing, Norwegian  
47 104 University of Science and Technology (NTNU), Norway  
48  
49 105 Marie Murphy, mh.murphy@ulster.ac.uk, Doctoral College, Ulster University, UK  
50  
51 106 Kelly O'Hara, ohara@ubi.pt, Sport Science Department, University Beira Interior, Portugal  
52  
53 107 Ayse Ozbil Torun, ayse.torun@northumbria.ac.uk, Department of Architecture and Built  
54 108 Environment, Northumbria University, UK  
55  
56 109 Federico Palumbo, f.palumbo1@studenti.uniroma4.it, Department of Movement, Human and Health  
57 110 Sciences, University of Rome "Foro Italico", Italy  
58  
59  
60

- 1  
2  
3 111 Stevo Popovic, stevop@ucg.ac.me, Faculty for Sport and Physical Education, University of  
4 112 Montenegro, Montenegro; Western Balkan Sport Innovation Lab, Montenegro  
5  
6 113 Olaf Prieske, prieske@fhsmg.de, University of Applied Sciences for Sports and Management  
7 114 Potsdam, Germany  
8  
9 115 Zrinka Puharic, zpuharic@vub.hr, University of Applied Sciences Bjelovar, Croatia; Faculty of dental  
10 116 medicine and health Osijek, Croatia  
11  
12 117 Jose Ribeiro, jribeiro@fade.up.pt, Faculty of Sport, University of Porto, Portugal  
13  
14 118 Penny Louise Sheena Ruimbold, penny.rumbold@northumbria.ac.uk, Department of Sport, Exercise  
15 119 and Rehabilitation, Northumbria University, UK  
16  
17 120 Petru Sandu, petru.sandu@insp.gov.ro, National Institute of Public Health in Romania, Romania  
18  
19 121 Maroje Sorić, masoric@kif.hr, Faculty of Kinesiology, University of Zagreb, Croatia; Faculty of Sport,  
20 122 University of Ljubljana, Slovenia  
21  
22 123 Mette Stavnsbo, Mette.Stavnsbo@uia.no, Department of Sport Science and Physical Education,  
23 124 Faculty of Health and Sport Sciences, University of Agder, Norway  
24  
25 125 Ioannis Syrmipas, jsyrmipas@gmail.com, Department of Physical Education and Sport Sciences,  
26 126 University of Thessaly, Greece  
27  
28 127 Hidde P. Van Der Ploeg, hp.vanderploeg@amsterdamumc.nl, Amsterdam UMC, Vrije Universiteit  
29 128 Amsterdam, Department of Public and Occupational Health, Amsterdam Public Health Research  
30 129 Institute, The Netherlands  
31  
32 130 Aurélie Van Hoye, aurelie.vanhoye@ul.ie, Physical Activity for Health Cluster, Health Research  
33 131 Institute, Department of Physical Education and Sport Sciences, University of Limerick, Ireland  
34  
35 132 Sofia Vilela, sofia.vilela@ispup.up.pt, EPIUnit - Institute of Public Health, University of Porto,  
36 133 Portugal; Laboratory for Integrative and Translational Research in Population Health (ITR), Portugal  
37  
38 134 Catherine Woods, Catherine.Woods@ul.ie, Physical Activity for Health Cluster, Health Research  
39 135 Institute, Department of Physical Education and Sport Sciences, University of Limerick, Ireland  
40  
41 136 Kathrin Wunsch, kathrin.wunsch@gmx.de, Institute of Sports and Sports Science, Karlsruhe Institute  
42 137 of Technology, Germany  
43  
44 138 Laura Capranica, laura.capranica@uniroma4.it, Department of Movement, Human and Health  
45 139 Sciences, University of Rome "Foro Italico", Italy  
46  
47 140 Ciaran MacDonncha, ciaran.macdonncha@ul.ie, Physical Activity for Health Research Cluster, Health  
48 141 Research Institute, University of Limerick, Ireland  
49  
50 142 Fiona Chun Man Ling, f.ling@northumbria.ac.uk, Department of Sport, Exercise and Rehabilitation,  
51 143 Northumbria University, UK  
52  
53 144 **Word count:**  
54  
55 145 Abstract – 288; Main text – 3590  
56  
57 146 Tables: 1  
58  
59  
60



1  
2  
3 147 **ABSTRACT**

4 148 **Introduction:** Physical activity among children and adolescents remains insufficient, despite the  
5  
6 149 substantial efforts made by researchers and policymakers. Identifying and furthering our  
7  
8 150 understanding of potential modifiable determinants of physical activity behaviour (PAB) and sedentary  
9  
10 151 behaviour (SB) is crucial for the development of interventions that promote a shift from SB to PAB. The  
11  
12 152 current protocol details the process through which a series of systematic literature reviews (SLRs) and  
13  
14 153 meta-analyses (MAs) will be conducted to produce a best-evidence statement (BEST) and inform policy  
15  
16 154 makers. The overall aim is to identify modifiable determinants that are associated with changes in PAB  
17  
18 155 and SB in children and adolescents (aged 5-19 years) and to quantify their effect on, or association  
19  
20 156 with, PAB/SB.

21 157 **Methods and analysis:** A search will be performed in MEDLINE, SportDiscus, Web of Science,  
22  
23 158 PsychINFO and Cochrane Central Register of Controlled Trials. Randomized controlled trials (RCT)s and  
24  
25 159 controlled trials (CT)s that investigate the effect of interventions on PAB/SB and longitudinal studies  
26  
27 160 that investigate the associations between modifiable determinants and PAB/SB at multiple time points  
28  
29 161 will be sought. Risk of bias assessments will be performed using adapted versions of Cochrane's RoB  
30  
31 162 2.0 and ROBINS-I tools for RCTs and CTs, respectively, and an adapted version of the National Institute  
32  
33 163 of Health's tool for longitudinal studies. Data will be synthesised narratively and, where possible, MAs  
34  
35 164 will be performed using Bayesian statistics. Modifiable determinants will be discussed considering the  
36  
37 165 settings in which they were investigated and the PAB/SB measurement methods used.

38 166 **Ethics and dissemination:** No ethical approval is needed as no primary data will be collected. The  
39  
40 167 findings will be disseminated in peer-reviewed publications and academic conferences where possible.  
41  
42 168 The BEST will also be shared with policy makers within the DE-PASS consortium in the first instance.

43 169 **Systematic review registration:** CRD42021282874

44 170 **Keywords:**

45 171 Physical activity, sedentary behaviour, children, adolescents, determinants, systematic review  
46  
47 172  
48  
49  
50  
51  
52  
53  
54  
55  
56  
57  
58  
59  
60

1  
2  
3 173 **Strengths and limitations of this study**

- 4 174 • Our goal is to identify modifiable and measurable determinants of physical activity and  
5 175 sedentary behaviour and mitigate sedentary behaviour to inform future interventions.  
6 176 • Modifiable determinants will be summarized and described within the settings in which they  
7 177 were investigated to contextualize how they interact with other determinants and  
8 178 subsequently affect physical activity and sedentary behaviour.  
9 179 • The body of evidence from high quality research will be summarised, accounting for  
10 180 differences in study designs, methodological quality and measurement methods of physical  
11 181 activity and sedentary behaviour.  
12 182 • The summarized body of work will be used to produce a best-evidence statement that can best  
13 183 inform future interventions and policy development.  
14 184 • Modifiable determinants reported in study designs which are not included in the current works  
15 185 may be overlooked and should be investigated in future reviews as they may provide insights  
16 186 into potentially effective interventions.  
17  
18  
19  
20  
21  
22  
23  
24  
25  
26  
27  
28  
29  
30  
31  
32  
33  
34  
35  
36  
37  
38  
39  
40  
41  
42  
43  
44  
45  
46  
47  
48  
49  
50  
51  
52  
53  
54  
55  
56  
57  
58  
59  
60

## 189 INTRODUCTION

190 Physical inactivity among children and adolescents is a global public health issue. Four in five (81%)  
191 adolescents across the world do not meet the World Health Organisation's (WHO) physical activity (PA)  
192 guidelines.[1,2] Physical inactivity is a contributing factor to the high prevalence of cardiovascular,  
193 metabolic and bone-health related conditions.[3] It is therefore important to promote physical activity  
194 behaviour (PAB) and minimize sedentary behaviour (SB) as part of a healthy lifestyle in children and  
195 adolescents to mitigate the negative effects of physical inactivity.[4] PA protects against the health  
196 conditions resulting from early physical inactivity and has a positive impact on the development of  
197 physical and mental health as children and adolescents transition into adulthood.[5] Despite  
198 substantial research efforts, relatively little robust and lasting changes in PAB and SB have been  
199 observed in this population.[6] The fact that PA guidelines are not met in a large proportion of young  
200 people points towards a lack of understanding and insufficient translation of the evidence behind what  
201 makes children and adolescents physically active into policy and public interventions.[7,8] Therefore,  
202 a better understanding of the determinants of PAB/SB is a crucial first step in developing interventions  
203 that lead to a sustained increase in PAB and reduced SB.[6,9] In the current protocol, we refer to  
204 'determinants' of PAB or SB as mechanisms that drive and explain behaviour adaptation in specific  
205 contexts.[9,10] We focus on modifiable determinants, signifying those which are malleable and can be  
206 altered through interventions, and present opportunities to intervene from public health and policy  
207 perspectives.[9,11] Using a rigorous methodology, our goal is to synthesise high-quality evidence on  
208 the effectiveness and association of key modifiable determinants on PAB/SB and produce a Best  
209 Evidence Statement (BEST) which can inform future interventions. We also aim to identify the settings  
210 for interventions that are most readily translatable to policy.

211 The current evidence of the effectiveness of modifiable determinants on PAB/SB is fragmented due to  
212 considerable variations in the methodologies used and the methodological quality across the available  
213 studies, which has contributed to largely inconclusive findings in systematic literature reviews (SLR)s  
214 and meta-analyses (MA)s.[6–8,11–16] To limit the variations across studies and extract trustworthy  
215 evidence, it is important to identify high-quality studies. Factors that contribute to methodological  
216 quality include research design and PAB/SB measurement methods. A range of research designs have  
217 been applied in existing PA research (e.g., cross-sectional, longitudinal, randomised controlled trials  
218 (RCT) and controlled trials (CT)). Potential causality between modifiable determinants and the  
219 outcome measures can be indicated by RCTs and CTs, and a well-designed RCT can minimise bias  
220 through randomisation and intention-to-treat analyses.[6,17,18] However, challenges in  
221 randomisation of PAB/SB interventions have been recognised,[19] therefore, CTs might be the next  
222 most credible alternative. Whilst RCTs are regarded as the 'gold standard', high-quality longitudinal

1  
2  
3 223 studies can provide indications of a causal relationship between modifiable determinants and the  
4  
5 224 outcome measures by virtue of the repeated measurements over time.[7] Furthermore, RCTs and CTs  
6  
7 225 can be short-lasting and may not capture the prolonged exposures that can be explored in longitudinal  
8  
9 226 follow-ups.[6] Therefore, we consider RCTs, CTs and longitudinal studies to be amongst the highest  
10  
11 227 quality of evidence appropriate to develop the BESt.

12 228 Methods for measurement of PAB/SB contribute to the disparities in the methodologies used between  
13  
14 229 studies. Data obtained from self-report methods are generally considered to be less sensitive to  
15  
16 230 change than data obtained via device-based methods due to recall errors, under-/overestimation or  
17  
18 231 interpretation discrepancies.[12,13,20,21] On the one hand, device-based measurements are deemed  
19  
20 232 to be more sensitive to behaviour change and can detect cognitively salient behaviours, such as time  
21  
22 233 spent in SB.[21] On the other hand, many studies rely on self-report measurements as they are less  
23  
24 234 costly, logistically easier to implement and are more applicable in some domains of behaviour (e.g.,  
25  
26 235 strength training) than device-based measurements.[21] Given that both device-based and self-report  
27  
28 236 methods present strengths and weaknesses, we consider it methodologically appropriate to include  
29  
30 237 both in BESt, provided that validity and reliability of the instruments are assessed and reported  
31  
32 238 thoroughly in the included studies. However, as previous research has shown low levels of agreement  
33  
34 239 between the two measurement methods, we will conduct separate analyses per method within SLRs  
35  
36 240 and MAs.[22]

37 241 Over the years, PAB/SB measurements have been used to assess different forms of PA, such as  
38  
39 242 structured PA (e.g., physical education), leisure-time PA and active transport PA, and different domains  
40  
41 243 where sedentary time is spent, such as screen-based activities (e.g., doing homework on computers),  
42  
43 244 leisure-based activities (e.g., sitting and reading), and transport-related (e.g., sitting in a bus).[13]  
44  
45 245 Recently, there has been an increased emphasis on identifying the settings (or contexts) in which  
46  
47 246 PAB/SB take place and the determinants at work within the settings, so that the settings of the most  
48  
49 247 impactful, modifiable determinants can be targeted when translating research into policy.[7,23]  
50  
51 248 Answering the questions about what works for whom (children and/or adolescents), why  
52  
53 249 (determinants and their interactions) and when/where (settings) is critical to advance our  
54  
55 250 understanding of the implementation and possible effectiveness of interventions.[24] Therefore, to  
56  
57 251 produce the BESt, we aim to investigate the modifiable determinants in their respective settings in  
58  
59 252 SLRs and MAs so that our results can inform future interventions within settings that speak to policy  
60  
253 makers.

254 The current protocol will be used to produce a series of SLRs and MAs aiming to investigate the  
255 effectiveness of modifiable determinants on PAB/SB in children and adolescents using high-quality

1  
2  
3 256 evidence available. Investigating the modifiable determinants of PAB/SB in their respective settings  
4  
5 257 will help contextualize their modifiability and effect. Therefore, to produce the BEST, it is important to  
6  
7 258 ascertain methodological rigour which is set apart from previous efforts in understanding PAB/SB  
8  
9 259 determinants in children and adolescents. By considering the settings of the modifiable determinants,  
10  
11 260 our results can readily inform policy makers and future PA interventions.

## 12 261 **Objectives**

13 262 The overarching aim of the proposed SLRs and MAs is to identify modifiable determinants that are  
14  
15 263 associated with changes in PAB and SB in children and adolescents (aged 5-19). Specific aims are:

- 16  
17 264 • To investigate which modifiable determinants of PAB and SB have been targeted in  
18  
19 265 interventions designed to promote PA in children and adolescents in RCTs and CTs.
- 20  
21 266 • To investigate which modifiable determinants are associated with PAB and SB in children and  
22  
23 267 adolescents in longitudinal studies.
- 24  
25 268 • To investigate what is the strength of the association between such modifiable determinants  
26  
27 269 and PAB/SB in children and adolescents.

## 28 29 270 **METHODS AND ANALYSIS**

30 271 The current protocol was registered in the International prospective register of systematic reviews  
31  
32 272 (PROSPERO) on 12/10/2021 with the registration number: CRD42021282874. The reporting in the  
33  
34 273 current protocol manuscript was guided by the Preferred Reporting Items for Systematic Review and  
35  
36 274 Meta-Analysis Protocols (PRISMA-P).[25]

37 275 The modifiable determinants that have been targeted in all included studies will be listed and analysed  
38  
39 276 narratively in SLRs. Meta-analytic methods will be applied to the data from intervention and  
40  
41 277 longitudinal studies. Analyses will be performed for different categories of studies based on (i)  
42  
43 278 methods for measurement of PAB/SB (e.g., self-report, device-based) and (ii) age (e.g., children aged  
44  
45 279 5-12 years, adolescents aged 12-19 years) in a series of SLRs and MAs with varying focus. Study settings  
46  
47 280 (e.g., school, home-based, leisure-time) will also be identified.

## 48 281 **Population**

49 282 Studies targeting children and adolescents with and without disabilities aged 5-19 years will be  
50  
51 283 included. Studies that report data for ages exceeding the specified age range will be excluded, unless  
52  
53 284 data for a sub-group within the included mean age can be extracted. Studies that include children  
54  
55 285 and/or adolescents with any reported diagnosed medical conditions known to affect PA participation  
56  
57 286 will be excluded (e.g., studies including cancer patients or individuals with anterior cruciate ligament  
58  
59 287 injury).

1  
2  
3 288 **Patient and Public Involvement**

4 289 No patient involved

6 290 **Types of studies**

7 291 We will include studies examining modifiable PAB/SB determinants in RCTs, CTs and longitudinal  
8  
9 292 studies. RCTs and CTs that investigate the effectiveness of interventions aiming to promote PA or  
10  
11 293 reduce SB in children and adolescents, should include control groups or other intervention groups, that  
12  
13 294 are matched to the experimental groups, and report pre- and post-intervention measurements of both  
14  
15 295 outcome measures and modifiable determinants. Longitudinal studies should investigate the  
16  
17 296 association between modifiable determinants of PA and PAB/SB in children and adolescents and report  
18  
19 297 measurements of both the modifiable determinants and PAB/SB at least at two time-points. No control  
20  
21 298 groups or comparisons will be required for the longitudinal studies. Length of follow-up or length of  
22  
23 299 intervention in any of the study designs will not be restricted, data will be extracted if reported for  
24  
25 300 participants within the specified age range (5-19 years).

25 301 **Outcomes**

26 302 The main outcome measures targeted in the current protocol are PAB and SB. Physical activity is  
27  
28 303 defined as any bodily movement produced by skeletal muscles that requires energy expenditure, thus  
29  
30 304 including any modality of movement at any intensity.[2] As such, PAB encompasses behaviours of  
31  
32 305 sedentary, light, moderate and vigorous intensity PA and SB includes any waking behaviour  
33  
34 306 characterised by an energy expenditure of 1.5 METs or lower while sitting, reclining or lying.[2,26]  
35  
36 307 Therefore, we will categorise PAB into light, moderate and vigorous intensity and SB-based types of  
37  
38 308 activities reported in the included studies. Any of the two types of measurement methods for PAB/SB,  
39  
40 309 including self-report methods (e.g., questionnaires, diaries, recall), and device-based methods (e.g.,  
41  
42 310 accelerometers, pedometers) will be included.[21] Moreover, we target studies which have reported  
43  
44 311 modifiable determinants as secondary measures. Where possible, we will explore the mediating effect  
45  
46 312 of the modifiable determinants in the changes in PAB/SB by analysing the structural relationship  
47  
48 313 between the modifiable determinants and PAB/SB.

47 314 **Comparators**

48 315 The main comparator will include PAB/SB measurement methods. The included studies will comprise  
49  
50 316 those adopting self-report or device-based measures of PAB/SB or both as outcome measures. Self-  
51  
52 317 report and device-based measures will be analysed separately. In studies where both device-based  
53  
54 318 and self-report measures are reported, the data for both measurement methods will be extracted and  
55  
56 319 analysed separately. In addition, to strengthen the BEST, results from the respective measurement  
57  
58 320 methods will be compared to provide further indication of the strength of the evidence yielded from  
59  
60 321 studies, depending on their measurement methods for PAB/SB. Classification of the settings in which  
322 the modifiable determinants were targeted will be identified once data have been extracted.

1  
2  
3 **323 Search strategy**

4 324 A search will be performed in MEDLINE (Ovid), PsycINFO (EBSCO), Web of Science, Sport Discus, and  
5  
6 325 Cochrane Central Register of Controlled Trials (CENTRAL). The piloted search strategy is presented in  
7  
8 326 Table 1. The search strategy is built using the main outcome measures of (1) PAB and (2) SB, and  
9  
10 327 synonyms of PAB/SB that are commonly used in PA research; (3) the targeted study designs (i.e., RCT,  
11  
12 328 CT and longitudinal studies) and related terms; (4) determinant and synonyms that are commonly used  
13  
14 329 in PA research; (5) the targeted population, to identify children and adolescents and synonyms that  
15  
16 330 are commonly used in PAB/SB research; and (6) measurement methods for PAB/SB such as  
17  
18 331 accelerometer or pedometer for device-based methods and diary and activity recall for self-report  
19  
20 332 methods.

21 333 For languages other than English, studies will be included if an English version is available, or if a  
22  
23 334 translation can be obtained through members of the review team. We will include studies published  
24  
25 335 from 2010 - which was the year when the first global PA guidelines were published by WHO[27] and  
26  
27 336 around the time previous SLRs with similar aims were published.[28,29] Only peer-reviewed studies  
28  
29 337 will be included and grey literature such as research reports, working papers, conference proceedings  
30  
31 338 and theses will be excluded during the search and at the initial screening of the studies.

32 339 Table 1. The search terms, Boolean commands and field indicators, presented for each domain.

| Domain                                                  | Search terms                                                                                                                                                                                                                                             |
|---------------------------------------------------------|----------------------------------------------------------------------------------------------------------------------------------------------------------------------------------------------------------------------------------------------------------|
| Outcome:<br>Physical activity<br>behaviour <sup>1</sup> | ("Physical activ*") OR (exercise) OR (sport*) OR (play) OR (exertion) OR<br>(recreation) OR (training) OR ("motor activit*") OR ("physical performance")<br>OR ("physical movement") OR ("physical effort") OR (exergaming)                              |
| <b>OR</b>                                               |                                                                                                                                                                                                                                                          |
| Outcome:<br>Sedentary<br>behaviour <sup>1</sup>         | (sedentar*) OR ("screen time") OR (gaming) OR ("computer use") OR (sitting)<br>OR (inactiv*) OR ("seated posture") OR ((watch* or view*) N/2 (TV or<br>television))                                                                                      |
| <b>AND</b>                                              |                                                                                                                                                                                                                                                          |
| Target<br>population <sup>1</sup>                       | (child*) OR (youth) OR (adolescen*) OR ("young people") OR ("school age*")<br>OR (p?ediatric) OR (juvenile) OR (teen*)                                                                                                                                   |
| <b>AND</b>                                              |                                                                                                                                                                                                                                                          |
| Study design <sup>2</sup>                               | (RCT) OR ("control* trial*") OR (quasi) OR (longitudinal) OR (intervention*) OR<br>(prospective) OR ("follow up")                                                                                                                                        |
| <b>OR</b>                                               |                                                                                                                                                                                                                                                          |
| Determinants <sup>2</sup>                               | (determinant*) OR (antecedent*) OR (predictor*) OR (mediator*) OR<br>(moderator*) OR (exposure*)                                                                                                                                                         |
| <b>AND</b>                                              |                                                                                                                                                                                                                                                          |
| Measurement<br>methods <sup>2</sup>                     | (acceleromet*) OR ("activity profile") OR (recall) OR (diary) OR ("activity<br>monitor*") OR ("heart rate monitor*") OR ("direct observation") OR<br>(actigraph*) OR ("activity track*") OR ("self report*") OR (survey) OR<br>(pedomet*) OR (wearable*) |

<sup>1</sup>Restricted search to title, abstract and keywords

<sup>2</sup>Search in entire study

340

1  
2  
3 341 **Study records**

4 342 The initial screening will be performed by one member of the review team to exclude records of grey  
5 343 literature and duplicates from the different databases. This will be performed in EndNote x9[30] – a  
6 344 reference management software. The same member of the review team will upload the resulting list  
7 345 to Covidence[31] – an online tool for SLRs in which screening, study selection, data extraction and risk  
8 346 of bias assessment will be completed. Covidence allows the distribution of studies among several  
9 347 reviewers in a process based on the PRISMA flow diagram for SLRs.[32]

10  
11 348 Several workshops will be held before the commencement of the respective stages (i.e. study  
12 349 screening, risk of bias assessments and data extraction) to ensure that all reviewers will be proficient  
13 350 in the procedures and to ensure agreement among them. As the review team consists of 31 members,  
14 351 an online communication tool – Slack[33] – will be used to maintain communication among the  
15 352 members of the review team throughout the review process to respond to queries and provide  
16 353 updates on the process. A core group of the review team will guide and support the review team  
17 354 members throughout the review process.

18  
19  
20 355 **Screening process**

21 356 At each stage of the screening process, each study will be screened by two blinded independent  
22 357 reviewers of the review team. Any conflicts between the independent reviewers will be resolved by a  
23 358 third reviewer, who is a member of the core group. An equal number of studies will be distributed  
24 359 among reviewers and random studies are selected by Covidence to be distributed to each reviewer. At  
25 360 the first stage, titles and abstracts will be assessed for eligibility using a pre-piloted decision tree based  
26 361 on the inclusion/exclusion criteria expected to be found in either the title or abstract. The full-text  
27 362 version of the studies that remain after title and abstract screening will then be uploaded to Covidence.  
28 363 At the second stage, full texts will be assessed for eligibility using the full inclusion/exclusion criteria.  
29 364 Reasons for exclusion of studies at the full-text stage will be recorded. Following the full-text screening,  
30 365 the included studies will be checked by one reviewer to exclude any duplicate reporting, that is,  
31 366 reporting of the results from the same sample in multiple studies or studies that have been published  
32 367 more than once. For this purpose, study information will be compared between studies, such as  
33 368 authors, study locations and settings, intervention content and design, sample size, demographic  
34 369 information and ethical committee approval number.[34] If duplicate reporting is detected among  
35 370 included studies, the reviewers will attempt to identify the main study which was duplicated. If the  
36 371 main study cannot be identified, the study with the longest follow-up or highest number of  
37 372 measurement time points will be selected for inclusion.[35,36]

38  
39  
40  
41  
42  
43  
44  
45  
46  
47  
48  
49  
50  
51  
52  
53  
54  
55  
56  
57  
58  
59  
60



### 373 **Data extraction**

374 A data extraction form will be created in Covidence and piloted ahead of the data extraction stage. The  
375 data extraction from each study will be completed by two independent reviewers. If any information  
376 or data are missing, or if clarifications are needed, the corresponding author of the respective studies  
377 will be contacted. If a response is not provided before data extraction completes, or if the reporting  
378 remains incomplete, the study will be excluded. Following the independent data extraction, the two  
379 reviewers will perform a consensus procedure to resolve any conflicts and ascertain the correctness of  
380 the extracted data.

381 The data extracted will include the following items:

- 382 • Study/intervention description: Study design, brief study intervention description, description  
383 of intervention design and content, description of control group activity, study setting.
- 384 • Sample information: Sample size, sample age (including age by sex), sex (including grouping  
385 based on sex; % Male, % Female), population type (disability/non-disability).
- 386 • Outcome measures and modifiable determinants: PAB/SB outcome measurement method  
387 type (e.g., self-report, device-based) and instrument (e.g., ActiGraph, Youth activity Profile, 7-  
388 day recall), length of device-based PAB/SB measurement (days), days of the week for device-  
389 based PAB/SB measurement (weekdays/weekend day), wear-time requirement for device-  
390 based PAB/SB measurement, unit of measure for PAB/SB, reported validity and reliability of  
391 PAB/SB measurements, modifiable determinant measurement instruments and their reported  
392 validity and reliability.
- 393 • Time frames: Intervention length (weeks), intervention location (country), number of  
394 measurement time points, length of follow-up (weeks).
- 395 • Results data: PAB/SB outcome data (mean, measures of variance), modifiable determinant  
396 data (mean, measures of variance).

### 397 **Risk of bias**

398 Different scales will be used for the assessment of risk of bias depending on the study design of each  
399 included study. For RCTs, a modified version of the Cochrane risk of bias tool for randomized trials (RoB  
400 2.0) will be used.[37] For CTs without randomization, a modified version of Cochrane's Risk of Bias in  
401 Non-randomized Studies - of Interventions (ROBINS-I) will be used.[38] The Cochrane tools, RoB 2.0  
402 and ROBINS-I, are modified to include an additional domain concerning the bias in measurement of  
403 the determinant(s). For longitudinal studies, an adapted version of the National Institutes of Health  
404 (NIH) quality assessment tool will be used.[39] The adaptation of the latter tool involves the  
405 exclusion/addition of items relevant to longitudinal studies, based on the tool used by Kontostoli et  
406 al.[40]

1  
2  
3 407 The two independent reviewers who extract the data from the respective studies will perform the risk  
4  
5 408 of bias assessment to ensure familiarity with the studies. The risk of bias assessment will be completed  
6  
7 409 in forms created in Covidence with the respective risk of bias tools as templates. Following the  
8  
9 410 independent data extraction, the two reviewers will perform a consensus procedure to resolve any  
10  
11 411 conflicts and ascertain the correctness of the assessment.

#### 12 412 **Data synthesis**

13 413 Data extraction will yield a data file containing data for the included RCTs, CTs and longitudinal studies,  
14  
15 414 and include populations with and without disabilities. A summary table will be created describing the  
16  
17 415 overall characteristics of the included studies with information on the methods (i.e., intervention  
18  
19 416 description for intervention studies/exposure for longitudinal studies), settings, modifiable  
20  
21 417 determinant(s), sample characteristics (i.e., sample size, age), and outcomes (i.e., outcome measures,  
22  
23 418 measure type, number of measures, measurement time points). Results of the risk of bias assessment  
24  
25 419 will be reported in a separate table.[41]

26 420 Findings will be synthesised narratively to identify and list the modifiable determinants and the settings  
27  
28 421 they were investigated in. Studies for disability and non-disability populations, and studies reporting  
29  
30 422 PAB/SB measured using self-report and device-based methods will be discussed separately. The  
31  
32 423 findings will be discussed considering the different settings and the quality of evidence included in the  
33  
34 424 review.

35 425 Most data extracted from the included studies are expected to be continuous. Where possible, meta-  
36  
37 426 analytic methods will be applied. MAs will be performed using both frequentist and Bayesian  
38  
39 427 approaches to statistical inference in JASP statistics software.[42] MAs will be performed for  
40  
41 428 intervention studies (RCTs and CTs) to investigate the effect of the interventions on PAB/SB and for  
42  
43 429 longitudinal studies to investigate the strength of the association between identified modifiable  
44  
45 430 determinants and PAB/SB. For studies including more than one experimental group or modifiable  
46  
47 431 determinant, each will be included in the MAs.

47 432 Direct effect will be investigated in frequentist pairwise comparisons, for which the standardized mean  
48  
49 433 difference (SMD) and the 95% confidence intervals (CI) will be calculated. We expect the presence of  
50  
51 434 heterogeneity among included studies in each MA due to the nature, settings or types of interventions.  
52  
53 435 Therefore, the MAs will be conducted using random effects models. For intervention studies, the post-  
54  
55 436 intervention data will be used to calculate the between-group difference while controlling for baseline  
56  
57 437 differences. For longitudinal studies, the within-group difference will be calculated as control groups  
58  
59 438 are not expected to be included in longitudinal studies. For data interpretation, effect size values of  
60  
439 SMD < 0.50 indicate small, of  $0.50 \leq \text{SMD} < 0.80$  indicate medium, and of  $\text{SMD} \geq 0.80$  indicate large

1  
2  
3 440 effects.[43] Heterogeneity will be identified using Cochran's Q, which is based on a Chi-square test  
4  
5 441 using the confidence interval size in relation to the degrees of freedom. Heterogeneity will also be  
6  
7 442 quantified by using  $I^2$ , which represents the degree (in %) of methodological consistency across studies  
8  
9 443 using the Chi-square statistic Q in relation to the degrees of freedom. For interpretation of  
10  
11 444 heterogeneity,  $I^2 < 25\%$  indicates low heterogeneity,  $25\% < I^2 < 50\%$  indicates moderate heterogeneity,  
12  
13 445 and  $I^2 > 75\%$  indicates high heterogeneity.[44] Benchmarks will be used to give an approximation for  
14  
15 446 the level of heterogeneity: 0% to 40%: might not be important; 30% to 60%: may represent moderate  
16  
17 447 heterogeneity; 50% to 90%: may represent substantial heterogeneity; 75% to 100%: considerable  
18  
19 448 heterogeneity.[45] The level for statistical significance will be set to  $\alpha < 0.05$ .

20  
21 449 The Bayesian approach to statistical inference will be applied for the MAs using random effects models.  
22  
23 450 For this, Gibbs sampling of the Markov Chain Monte Carlo (MCMC) algorithm will be used in JASP.[42]  
24  
25 451 The probability for publication bias will also be calculated using the JASP extension Robust Bayesian  
26  
27 452 Meta-analysis (RoBMA). We will apply RoBMA to conduct state of the art publication bias-adjusted  
28  
29 453 MA.[46,47] The Bayesian framework will allow for Bayesian model averaging,[48] taking several  
30  
31 454 plausible models into account and alleviating concerns about selecting the right model from the variety  
32  
33 455 of adjustment methods available.[49] In addition, RoBMA has several other benefits – it allows  
34  
35 456 researchers to (1) quantify evidence on a continuous scale, including for the null, (2) avoid  
36  
37 457 accumulation bias, and (3) ease estimation problems by using prior distributions. We will use the prior  
38  
39 458 specifications[46] and models with the modification of removing the fixed-effects models.

40  
41 459 Additionally, the mediation effects of determinants on PAB/SB will be investigated using frequentist  
42  
43 460 meta-analytical structural equation modelling (meta-SEM).[50] To conduct meta-SEM, the covariance  
44  
45 461 structure of the mediation is required. If this information is not presented in a primary study, the  
46  
47 462 authors will be contacted. We will conduct meta-SEM only when we can extract the required data.

#### 48 49 50 51 52 53 54 55 56 57 58 59 60

### 463 **ETHICS AND DISSEMINATION**

464 The current protocol describes the process through which a series of SLRs and MAs will be performed,  
465 with the aim to identify modifiable determinants that are (in)effective in influencing PAB and SB in  
466 children and adolescents. The findings of the resultant studies will be disseminated in peer-reviewed  
467 publications and academic conferences where possible. Modifiable determinants from studies with  
468 different study designs and measured using self-report or device-based methods will be reported  
469 separately in different publications. The BEST will also be shared with policy makers within the DE-PASS  
470 consortium in the first instance. As no primary data will be collected, no ethical approval is required.

1  
2  
3 471 **Author contributions**

4  
5 472 Conceptualization: C.M., F.C.M.L., M.K., A.M., G.D.T., K.N.

6  
7 473 Methodology: C.M., F.C.M.L., M.K., A.M., G.D.T., K.N., F.B., R.P., M.M.

8  
9 474 Writing—original draft preparation: M.K., A.M., G.D.T., F.C.M.L.

10  
11 475 Writing—review and editing: M.K., A.M., G.D.T., K.N., F.B., R.P., M.M., F.B., S.B., M.B., G.C., A.C., C.C.,

12  
13 476 H.C., A.C., S.C., J.C.S., V.Č., C.C., C.C., E.D., A.D.B., A.D.C., P.D., R.M.D.T., F.G., E.G.S., M.G., B.G., M.G.,

14  
15 477 G.H., S.H., P.I., H.J., J.J., P.J., A.K., A.K., E.K., F.M., B.M., T.M., P.J.M., M.M., K.O., A.O.T., F.P., S.P.,

16  
17 478 O.P., Z.P., J.R., P.L.S.R., P.S., M.S., M.S., I.S., H.P.V.D.P., A.V.H., S.V., C.W., K.W., L.C., C.M., F.C.M.L.

18  
19 479 Supervision: F.C.M.L., G.D.T.

20  
21 480 Project administration: F.C.M.L., A.M., K.N., G.D.T., M.K.

22  
23 481 All authors have read and agreed to the submitted version of the manuscript.

24  
25  
26 482 **Funding**

27 483 This article is based upon work from COST Action (Action/Grant number: CA19101) Determinants of

28 484 Physical Activities in Settings (DE-PASS), supported by COST (European Cooperation in Science and

29 485 Technology). The content of this article reflects only the authors' views and the European Community

30 486 is not liable for any use that may be made of the information contained therein.

31 487 COST (European Cooperation in Science and Technology) is a funding agency for research and

32 488 innovation networks. Our Actions help connect research initiatives across Europe and enable scientists

33 489 to grow their ideas by sharing them with their peers. This boosts their research, career and innovation.

34 490 [www.cost.eu](http://www.cost.eu)

35  
36 491 **Competing interests**

37 492 The authors declare no competing interests.

38  
39  
40  
41  
42  
43  
44  
45  
46 493

## 494 REFERENCES

- 495 1 Guthold R, Stevens GA, Riley LM, *et al.* Global trends in insufficient physical activity among  
496 adolescents: a pooled analysis of 298 population-based surveys with 1.6 million participants.  
497 *Lancet Child Adolesc Heal* 2020;**4**:23–35. doi:10.1016/S2352-4642(19)30323-2
- 498 2 Bull FC, Al-Ansari SS, Biddle S, *et al.* World Health Organization 2020 guidelines on physical  
499 activity and sedentary behaviour. *Br J Sports Med* 2020;**54**:1451–62. doi:10.1136/bjsports-  
500 2020-102955
- 501 3 World Health Organization. Global Status Report On Noncommunicable Diseases 2014. 2014.
- 502 4 Telama R. Tracking of physical activity from childhood to adulthood: A review. *Obes Facts*  
503 2009;**2**:187–95. doi:10.1159/000222244
- 504 5 Biddle SJH, Ciaccioni S, Thomas G, *et al.* Physical activity and mental health in children and  
505 adolescents: An updated review of reviews and an analysis of causality. *Psychol Sport Exerc*  
506 2019;**42**:146–55. doi:10.1016/j.psychsport.2018.08.011
- 507 6 Bauman AE, Reis RS, Sallis JF, *et al.* Correlates of physical activity: why are some people  
508 physically active and others not ? *Lancet* 2012;**380**:258–71. doi:10.1016/S0140-  
509 6736(12)60735-1
- 510 7 Brug J, van der Ploeg HP, Loyen A, *et al.* Determinants of diet and physical activity (DEDIPAC):  
511 A summary of findings. *Int J Behav Nutr Phys Act* 2017;**14**:1–24. doi:10.1186/s12966-017-  
512 0609-5
- 513 8 Puggina A, Aleksovska K, Buck C, *et al.* Policy determinants of physical activity across the life  
514 course: A DEDIPAC' umbrella systematic literature review. *Eur J Public Health* 2018;**28**:105–18.  
515 doi:10.1093/eurpub/ckx174
- 516 9 Keller C, Ferrer RA, King RB, *et al.* Future directions of the National Institutes of Health Science  
517 of Behavior Change Program. *Transl Behav Med* 2021;**11**:1795–801. doi:10.1093/tbm/ibab029
- 518 10 HM Treasury. Magenta Book: Central Government guidance on evaluation. 2020.  
519 [https://assets.publishing.service.gov.uk/government/uploads/system/uploads/attachment\\_d](https://assets.publishing.service.gov.uk/government/uploads/system/uploads/attachment_data/file/879438/HMT_Magenta_Book.pdf)  
520 [ata/file/879438/HMT\\_Magenta\\_Book.pdf](https://assets.publishing.service.gov.uk/government/uploads/system/uploads/attachment_data/file/879438/HMT_Magenta_Book.pdf)
- 521 11 Condello G, Puggina A, Aleksovska K, *et al.* Behavioral determinants of physical activity across  
522 the life course: A 'DEterminants of Diet and Physical ACTivity' (DEDIPAC) umbrella systematic  
523 literature review. *Int J Behav Nutr Phys Act* 2017;**14**. doi:10.1186/s12966-017-0510-2
- 524 12 Aleksovska K, Puggina A, Giraldi L, *et al.* Biological determinants of physical activity across the  
525 life course: A "determinants of diet and physical activity" (dedipac) umbrella systematic  
526 literature review. *Sport Med - Open* 2019;**5**. doi:10.1186/s40798-018-0173-9
- 527 13 Cortis C, Puggina A, Pesce C, *et al.* Psychological determinants of physical activity across the  
528 life course : A " DEterminants of Diet and Physical ACTivity " ( DEDIPAC ) umbrella systematic  
529 literature review. *PLoS One* 2017;**12**:1–25. doi:10.1186/s12966-017-0609-5
- 530 14 Jaeschke L, Steinbrecher A, Luzak A, *et al.* Socio-cultural determinants of physical activity  
531 across the life course: A 'DEterminants of Diet and Physical Activity' (DEDIPAC) umbrella  
532 systematic literature review. *Int J Behav Nutr Phys Act* 2017;**14**:1–15. doi:10.1186/s12966-  
533 017-0627-3
- 534 15 O'Donoghue G, Kennedy A, Puggina A, *et al.* Socio-economic determinants of physical activity  
535 across the life course: A 'DEterminants of Diet and Physical ACTivity' (DEDIPAC) umbrella  
536 literature review. *Sport Med - Open* 2020;**6**:1–24. doi:10.1186/s40798-020-00291-6

- 1  
2  
3 537 16 Martin Ginis KA, van der Ploeg HP, Foster C, *et al.* Participation of people living with  
4 538 disabilities in physical activity: a global perspective. *Lancet* 2021;**398**:443–55.  
5 539 doi:10.1016/S0140-6736(21)01164-8  
6  
7 540 17 Elferink-Gemser MT, te Wierike SC, Visscher C. Multidisciplinary longitudinal studies: A  
8 541 Perspective from the field of sports. In: Ericsson AK, Hoffman R, Kozbelt A, *et al.*, eds. *The*  
9 542 *Cambridge Handbook of Expertise and Expert Performance*. Cambridge: : Cambridge  
10 543 University Press 2018. 271–90.  
11  
12 544 18 Lefebvre C, Glanville J, Briscoe S, *et al.* Chapter 4: Searching for and selecting studies. In:  
13 545 Higgins J, Thomas J, Chandler J, *et al.*, eds. *Cochrane Handbook for Systematic Reviews of*  
14 546 *Interventions version 6.2*. Cochrane 2021. www.training.cochrane.org/handbook  
15  
16 547 19 Dobbins M, Husson H, DeCorby K, *et al.* School-based physical activity programs for promoting  
17 548 physical activity and fitness in children and adolescents aged 6 to 18. *Cochrane Database Syst*  
18 549 *Rev* Published Online First: 2013. doi:10.1002/14651858.CD007651.pub2  
19  
20 550 20 Van Der Horst K, Paw MJCA, Twisk JWR, *et al.* A brief review on correlates of physical activity  
21 551 and sedentariness in youth. *Med Sci Sports Exerc* 2007;**39**:1241–50.  
22 552 doi:10.1249/mss.0b013e318059bf35  
23  
24 553 21 Troiano RP, Pettee Gabriel KK, Welk GJ, *et al.* Reported physical activity and sedentary  
25 554 behavior: Why do you ask? *J Phys Act Health* 2012;**9 Suppl 1**:68–75. doi:10.1123/jpah.9.s1.s68  
26  
27 555 22 Gorzelitz J, Peppard PE, Malecki K, *et al.* Predictors of discordance in self-report versus device-  
28 556 measured physical activity measurement. *Ann Epidemiol* 2018;**28**:427–31.  
29 557 doi:10.1016/j.annepidem.2018.03.016  
30  
31 558 23 Newman L, Baum F, Javanparast S, *et al.* Addressing social determinants of health inequities  
32 559 through settings : a rapid review. *Health Promot Int* 2015;**30**:126–43.  
33 560 doi:10.1093/heapro/dav054  
34  
35 561 24 Rycroft-Malone J, McCormack B, Hutchinson AM, *et al.* Realist synthesis: illustrating the  
36 562 method for implementation research. *Implement Sci* 2012;**7**:1–10. doi:10.1186/1748-5908-7-  
37 563 33  
38  
39 564 25 Shamseer L, Moher D, Clarke M, *et al.* Preferred reporting items for systematic review and  
40 565 meta-analysis protocols (PRISMA-P) 2015: Elaboration and explanation. *BMJ* 2015;**349**:1–25.  
41 566 doi:10.1136/bmj.g7647  
42  
43 567 26 Tremblay MS, Aubert S, Barnes JD, *et al.* Sedentary Behavior Research Network (SBRN) -  
44 568 Terminology Consensus Project process and outcome. *Int J Behav Nutr Phys Act* 2017;**14**:1–17.  
45 569 doi:10.1186/s12966-017-0525-8  
46  
47 570 27 World Health Organization. *Global recommendations on physical activity for health*. Geneva:  
48 571 World Health Organisation 2010.  
49  
50 572 28 Craggs C, Corder K, Van Sluijs EMF, *et al.* Determinants of change in physical activity in  
51 573 children and adolescents: A systematic review. *Am J Prev Med* 2011;**40**:645–58.  
52 574 doi:10.1016/j.amepre.2011.02.025  
53  
54 575 29 Uijtdewilligen L, Nauta J, Singh AS, *et al.* Determinants of physical activity and sedentary  
55 576 behaviour in young people: A review and quality synthesis of prospective studies. *Br J Sports*  
56 577 *Med* 2011;**45**:896–905. doi:10.1136/bjsports-2011-090197  
57  
58 578 30 Clarivate. Endnote version x9. 2020.https://endnote.com/  
59  
60 579 31 Veritas Health Innovation. Covidence systematic review software. www.covidence.org

- 1  
2  
3 580 32 Matthew P, Joanne M, Patrick B, *et al.* PRISMA 2020 statement: updated guidelines for  
4 581 reporting systematic reviews and meta analyses. *26th Cochrane Colloquium, Santiago, Chile*  
5 582 Published Online First: 2019. doi:10.1136/bmj.n71  
6  
7 583 33 Slack. Slack is where the future works. [www.slack.com](http://www.slack.com)  
8  
9 584 34 Higgins J, Deeks J. Selecting Studies and Collecting Data. *Cochrane Handb. Syst. Rev. Interv.*  
10 585 2008;:151–85. doi:<https://doi.org/10.1002/9780470712184.ch7>  
11  
12 586 35 Wood JA. Methodology for Dealing With Duplicate Study Effects in a Meta-Analysis. 2008;:79–  
13 587 95. doi:10.1177/1094428106296638  
14  
15 588 36 von Elm E, Poglía G, Walder B, *et al.* Different Patterns of Duplicate Publication: An Analysis of  
16 589 Articles Used in Systematic Reviews Erik. *Jama* 2004;**291**:974. doi:10.1001/jama.291.8.974  
17  
18 590 37 Higgins JPT, Altman DG, Gøtzsche PC, *et al.* The Cochrane Collaboration’s tool for assessing  
19 591 risk of bias in randomised trials. *BMJ* 2011;**343**:1–9. doi:10.1136/bmj.d5928  
20  
21 592 38 Sterne JA, Hernán MA, Reeves BC, *et al.* ROBINS-I: A tool for assessing risk of bias in non-  
22 593 randomised studies of interventions. *BMJ* 2016;**355**:4–10. doi:10.1136/bmj.i4919  
23  
24 594 39 National Institute of Health. Quality Assessment Tool for Observational Cohort and Cross-  
25 595 Sectional Studies. 2014.[https://www.nhlbi.nih.gov/health-topics/study-quality-assessment-](https://www.nhlbi.nih.gov/health-topics/study-quality-assessment-tools)  
26 596 [tools](https://www.nhlbi.nih.gov/health-topics/study-quality-assessment-tools)  
27  
28 597 40 Kontostoli E, Biddle SJH, Jones AP, *et al.* Age-related change in sedentary behavior during  
29 598 childhood and adolescence : A systematic review and meta-analysis. 2021;:1–11.  
30 599 doi:10.1111/obr.13263  
31  
32 600 41 Schünemann H, Higgins J, Vist G, *et al.* Chapter 14: Completing ‘Summary of findings’ tables  
33 601 and grading the certainty of the evidence. In: Higgins J, Thomas J, Chandler J, *et al.*, eds.  
34 602 *Cochrane Handbook for Systematic Reviews of Interventions version 6.2.* Cochrane 2021.  
35 603 [www.training.cochrane.org/handbook](http://www.training.cochrane.org/handbook)  
36  
37 604 42 Jasp Team. JASP (Version 0.14.1). 2020.  
38  
39 605 43 Cohen J. *Statistical power analysis for the behavioral sciences.* 2nd ed. New Jersey: : Lawrence  
40 606 Erlbaum Associates Inc. 1988.  
41  
42 607 44 Julian PT Higgins, Simon G Thompson, Jonathan J Deeks DGA. Measuring inconsistency in  
43 608 meta-analyses. *Br Med J* 2003;**327**:557–60. doi:10.1136/bmj.327.7414.557  
44  
45 609 45 Deeks JJ, Higgins JPT, Altman DG, *et al.* Analysing data and undertaking meta-analyses.  
46 610 *Cochrane Handb. Syst. Rev. Interv.* 2019;:241–84.  
47 611 doi:<https://doi.org/10.1002/9781119536604.ch10>  
48  
49 612 46 Bartoš F, Maier M, Wagenmakers E-J, *et al.* No Need to Choose: Robust Bayesian Meta-  
50 613 Analysis with Competing Publication Bias Adjustment Methods. Published Online First: 2021.  
51 614 doi:10.31234/osf.io/kvsp7  
52  
53 615 47 Maier M, Bartoš F, Wagenmakers E-J. Robust Bayesian Meta-Analysis: Addressing Publication  
54 616 Bias with Model-Averaging. *Psychol Methods* doi:10.31234/osf.io/kvsp7  
55  
56 617 48 Hinne M, Gronau QF, van den Bergh D, *et al.* A Conceptual Introduction to Bayesian Model  
57 618 Averaging. *Adv Methods Pract Psychol Sci* 2020;**3**:200–15. doi:10.1177/2515245919898657  
58  
59 619 49 Carter EC, Schönbrodt FD, Gervais WM, *et al.* Correcting for Bias in Psychology: A Comparison  
60 620 of Meta-Analytic Methods. *Adv Methods Pract Psychol Sci* 2019;**2**:115–44.  
61 621 doi:10.1177/2515245919847196

1  
2  
3 622 50 Jak S, Li H, Kolbe L, *et al.* Meta-analytic structural equation modeling made easy: A tutorial  
4 623 and web application for one-stage MASEM. *Res Synth Methods* 2021;**12**:590–606.  
5 624 doi:10.1002/jrsm.1498  
6  
7 625  
8  
9  
10  
11  
12  
13  
14  
15  
16  
17  
18  
19  
20  
21  
22  
23  
24  
25  
26  
27  
28  
29  
30  
31  
32  
33  
34  
35  
36  
37  
38  
39  
40  
41  
42  
43  
44  
45  
46  
47  
48  
49  
50  
51  
52  
53  
54  
55  
56  
57  
58  
59  
60

For peer review only



**PRISMA-P (Preferred Reporting Items for Systematic review and Meta-Analysis Protocols) 2015 checklist: recommended items to address in a systematic review protocol\***

| Section and topic                 | Item No | Checklist item                                                                                                                                                                                                                |
|-----------------------------------|---------|-------------------------------------------------------------------------------------------------------------------------------------------------------------------------------------------------------------------------------|
| <b>ADMINISTRATIVE INFORMATION</b> |         |                                                                                                                                                                                                                               |
| Title:                            |         |                                                                                                                                                                                                                               |
| Identification                    | 1a      | Identify the report as a protocol of a systematic review                                                                                                                                                                      |
| Update                            | 1b      | If the protocol is for an update of a previous systematic review, identify as such                                                                                                                                            |
| Registration                      | 2       | If registered, provide the name of the registry (such as PROSPERO) and registration number                                                                                                                                    |
| Authors:                          |         |                                                                                                                                                                                                                               |
| Contact                           | 3a      | Provide name, institutional affiliation, e-mail address of all protocol authors; provide physical mailing address of corresponding author                                                                                     |
| Contributions                     | 3b      | Describe contributions of protocol authors and identify the guarantor of the review                                                                                                                                           |
| Amendments                        | 4       | If the protocol represents an amendment of a previously completed or published protocol, identify as such and list changes; otherwise, state plan for documenting important protocol amendments                               |
| Support:                          |         |                                                                                                                                                                                                                               |
| Sources                           | 5a      | Indicate sources of financial or other support for the review                                                                                                                                                                 |
| Sponsor                           | 5b      | Provide name for the review funder and/or sponsor                                                                                                                                                                             |
| Role of sponsor or funder         | 5c      | Describe roles of funder(s), sponsor(s), and/or institution(s), if any, in developing the protocol                                                                                                                            |
| <b>INTRODUCTION</b>               |         |                                                                                                                                                                                                                               |
| Rationale                         | 6       | Describe the rationale for the review in the context of what is already known                                                                                                                                                 |
| Objectives                        | 7       | Provide an explicit statement of the question(s) the review will address with reference to participants, interventions, comparators, and outcomes (PICO)                                                                      |
| <b>METHODS</b>                    |         |                                                                                                                                                                                                                               |
| Eligibility criteria              | 8       | Specify the study characteristics (such as PICO, study design, setting, time frame) and report characteristics (such as years considered, language, publication status) to be used as criteria for eligibility for the review |
| Information sources               | 9       | Describe all intended information sources (such as electronic databases, contact with study authors, trial registers or other grey literature sources) with planned dates of coverage                                         |
| Search strategy                   | 10      | Present draft of search strategy to be used for at least one electronic database, including planned limits, such that it could be repeated                                                                                    |
| Study records:                    |         |                                                                                                                                                                                                                               |
| Data management                   | 11a     | Describe the mechanism(s) that will be used to manage records and data throughout the review                                                                                                                                  |

|                                    |     |                                                                                                                                                                                                                                                  |
|------------------------------------|-----|--------------------------------------------------------------------------------------------------------------------------------------------------------------------------------------------------------------------------------------------------|
| Selection process                  | 11b | State the process that will be used for selecting studies (such as two independent reviewers) through each phase of the review (that is, screening, eligibility and inclusion in meta-analysis)                                                  |
| Data collection process            | 11c | Describe planned method of extracting data from reports (such as piloting forms, done independently, in duplicate), any processes for obtaining and confirming data from investigators                                                           |
| Data items                         | 12  | List and define all variables for which data will be sought (such as PICO items, funding sources), any pre-planned data assumptions and simplifications                                                                                          |
| Outcomes and prioritization        | 13  | List and define all outcomes for which data will be sought, including prioritization of main and additional outcomes, with rationale                                                                                                             |
| Risk of bias in individual studies | 14  | Describe anticipated methods for assessing risk of bias of individual studies, including whether this will be done at the outcome or study level, or both; state how this information will be used in data synthesis                             |
| Data synthesis                     | 15a | Describe criteria under which study data will be quantitatively synthesised                                                                                                                                                                      |
|                                    | 15b | If data are appropriate for quantitative synthesis, describe planned summary measures, methods of handling data and methods of combining data from studies, including any planned exploration of consistency (such as $I^2$ , Kendall's $\tau$ ) |
|                                    | 15c | Describe any proposed additional analyses (such as sensitivity or subgroup analyses, meta-regression)                                                                                                                                            |
|                                    | 15d | If quantitative synthesis is not appropriate, describe the type of summary planned                                                                                                                                                               |
| Meta-bias(es)                      | 16  | Specify any planned assessment of meta-bias(es) (such as publication bias across studies, selective reporting within studies)                                                                                                                    |
| Confidence in cumulative evidence  | 17  | Describe how the strength of the body of evidence will be assessed (such as GRADE)                                                                                                                                                               |

**\* It is strongly recommended that this checklist be read in conjunction with the PRISMA-P Explanation and Elaboration (cite when available) for important clarification on the items. Amendments to a review protocol should be tracked and dated. The copyright for PRISMA-P (including checklist) is held by the PRISMA-P Group and is distributed under a Creative Commons Attribution Licence 4.0.**

*From: Shamseer L, Moher D, Clarke M, Ghersi D, Liberati A, Petticrew M, Shekelle P, Stewart L, PRISMA-P Group. Preferred reporting items for systematic review and meta-analysis protocols (PRISMA-P) 2015: elaboration and explanation. BMJ. 2015 Jan 2;349(jan02 1):g7647.*

# BMJ Open

## DE-PASS Best Evidence Statement (BEST) – Modifiable determinants of physical activity and sedentary behaviour in children and adolescents aged 5-19 years: A protocol for systematic review and meta-analysis

|                               |                                                                                                                                                                                                                                                                                                                                                                                                                                                                                                                                                                                                                                                                                                                                                                                                                                                                                                                                                                                                                                                                                                                                                                                                                                                                                                                                                                                                                                                                                                                                                                                                                                                                                                                                                                                                                                                                                                                                                                                                                                                                                                                                                                                                                                                                                                           |
|-------------------------------|-----------------------------------------------------------------------------------------------------------------------------------------------------------------------------------------------------------------------------------------------------------------------------------------------------------------------------------------------------------------------------------------------------------------------------------------------------------------------------------------------------------------------------------------------------------------------------------------------------------------------------------------------------------------------------------------------------------------------------------------------------------------------------------------------------------------------------------------------------------------------------------------------------------------------------------------------------------------------------------------------------------------------------------------------------------------------------------------------------------------------------------------------------------------------------------------------------------------------------------------------------------------------------------------------------------------------------------------------------------------------------------------------------------------------------------------------------------------------------------------------------------------------------------------------------------------------------------------------------------------------------------------------------------------------------------------------------------------------------------------------------------------------------------------------------------------------------------------------------------------------------------------------------------------------------------------------------------------------------------------------------------------------------------------------------------------------------------------------------------------------------------------------------------------------------------------------------------------------------------------------------------------------------------------------------------|
| Journal:                      | <i>BMJ Open</i>                                                                                                                                                                                                                                                                                                                                                                                                                                                                                                                                                                                                                                                                                                                                                                                                                                                                                                                                                                                                                                                                                                                                                                                                                                                                                                                                                                                                                                                                                                                                                                                                                                                                                                                                                                                                                                                                                                                                                                                                                                                                                                                                                                                                                                                                                           |
| Manuscript ID                 | bmjopen-2021-059202.R1                                                                                                                                                                                                                                                                                                                                                                                                                                                                                                                                                                                                                                                                                                                                                                                                                                                                                                                                                                                                                                                                                                                                                                                                                                                                                                                                                                                                                                                                                                                                                                                                                                                                                                                                                                                                                                                                                                                                                                                                                                                                                                                                                                                                                                                                                    |
| Article Type:                 | Protocol                                                                                                                                                                                                                                                                                                                                                                                                                                                                                                                                                                                                                                                                                                                                                                                                                                                                                                                                                                                                                                                                                                                                                                                                                                                                                                                                                                                                                                                                                                                                                                                                                                                                                                                                                                                                                                                                                                                                                                                                                                                                                                                                                                                                                                                                                                  |
| Date Submitted by the Author: | 28-Apr-2022                                                                                                                                                                                                                                                                                                                                                                                                                                                                                                                                                                                                                                                                                                                                                                                                                                                                                                                                                                                                                                                                                                                                                                                                                                                                                                                                                                                                                                                                                                                                                                                                                                                                                                                                                                                                                                                                                                                                                                                                                                                                                                                                                                                                                                                                                               |
| Complete List of Authors:     | <p>Khudair, Mohammed; Northumbria University - City Campus, Sport, Exercise and Rehabilitation</p> <p>Marcuzzi, Anna; Norwegian University of Science and Technology, Public Health and Nursing</p> <p>Ng, Kwok; University of Eastern Finland, School of Educational Sciences and Psychology; University of Limerick, Department of Physical Education and Sport Sciences</p> <p>Tempest, Gavin; Northumbria University Faculty of Health and Life Sciences, Sport, Exercise and Rehabilitation</p> <p>Bartoš, František; University of Amsterdam, Department of Psychology</p> <p>Peric, Ratko; Exercise Physiology Laboratory, OrthoSport Banja Luka</p> <p>Maier, Maximilian; University College London</p> <p>Beccia, Flavia; Università Cattolica del Sacro Cuore Facoltà di Psicologia</p> <p>Boccia, S; Università Cattolica del Sacro Cuore Facoltà di Medicina e Chirurgia, Section of Hygiene, University Department of Life Sciences and Public Health; Fondazione Policlinico Universitario Agostino Gemelli IRCCS, Department of Woman and Child Health and Public Health - Public Health Area</p> <p>Brandes, Mirko; Leibniz Institute for Prevention Research and Epidemiology, Prevention and Evaluation</p> <p>Cardon, Greet; Ghent University, Movement and Sports Sciences</p> <p>Carlin, Angela; University of Ulster, School of Sport</p> <p>Castagna, Carolina; Università Cattolica del Sacro Cuore Facoltà di Psicologia</p> <p>Chaabene, Helmi; University of Potsdam Faculty of Human Sciences; University of Jendouba</p> <p>Chalkley, Anna; Western Norway University of Applied Sciences Faculty of Education; University of Bradford Faculty of Health Studies</p> <p>Ciaccioni, Simone; University of Rome 'Foro Italico'</p> <p>Cieślińska-Świder, Joanna; The Jerzy Kukuczka Academy of Physical Education in Katowice Poland</p> <p>Čingienė, Vilma; Mykolas Romeris University</p> <p>Cortis, Cristina; University of Cassino and Lazio Meridionale</p> <p>Corvino, Chiara; Università Cattolica del Sacro Cuore Facoltà di Psicologia</p> <p>de Geus, Eco; VU University Amsterdam, Biological Psychology; VU University Medical Center, EMGO+ Institute of Health and Care Research</p> <p>Di Baldassarre, Angela; Gabriele d'Annunzio University of Chieti and</p> |

|    |                                                                          |
|----|--------------------------------------------------------------------------|
| 1  |                                                                          |
| 2  |                                                                          |
| 3  |                                                                          |
| 4  | Pescara                                                                  |
| 5  | Di Credico, Andrea; Gabriele d'Annunzio University of Chieti and Pescara |
| 6  | Drid, Patrik; University of Novi Sad                                     |
| 7  | Fernández Tarazaga , Rosa M <sup>a</sup> ; Fundación para la Formación e |
| 8  | Investigación Sanitarias de la Región de Murcia                          |
| 9  | Gallè, Francesca; University of Naples - Parthenope, Department of       |
| 10 | Movement Sciences and Wellbeing                                          |
| 11 | García Sánchez, Esther; Fundación para la Formación e Investigación      |
| 12 | Sanitarias de la Región de Murcia                                        |
| 13 | Gebremariam, Mekdes ; Universitetet i Oslo Det medisinske fakultet,      |
| 14 | Nutrition                                                                |
| 15 | Ghinassi, Barbara; Gabriele d'Annunzio University of Chieti and Pescara  |
| 16 | Goudas, Marios; University of Thessaly                                   |
| 17 | Hayes, Grainne; Technological University of the Shannon: Midlands        |
| 18 | Midwest, Moylish Campus; University of Limerick                          |
| 19 | Honorio, Samuel; Polytechnic Institute of Castelo Branco                 |
| 20 | Izzicupo, Pascal; Gabriele d'Annunzio University of Chieti and Pescara   |
| 21 | Department of Sciences                                                   |
| 22 | Jahre, Henriette; Oslo Metropolitan University                           |
| 23 | Jelsma, Judith; Amsterdam UMC - Locatie VUMC, Public and Occupational    |
| 24 | Health                                                                   |
| 25 | Juric, Petra; University of Zagreb                                       |
| 26 | Kolovelonis, Athanasios; University of Thessaly                          |
| 27 | Kongsvold, Atle; Norwegian University of Science and Technology, Public  |
| 28 | Health and Nursing                                                       |
| 29 | Kouidi, Evangelia; Aristotle University of Thessaloniki                  |
| 30 | Mansergh, Fiona; Department of Health, Health and Wellbeing              |
| 31 | Programme                                                                |
| 32 | Masanovic, Bojan; University of Montenegro; Montenegrosport              |
| 33 | Mekonnen, Teferi; University of Oslo                                     |
| 34 | Mork, Paul Jarle; Norges teknisk-naturvitenskapelige universitet,        |
| 35 | Department of Public Health and Nursing                                  |
| 36 | Murphy, Marie; University of Ulster, Sport and Exercise Science          |
| 37 | O'Hara, Kelly; University of Beira Interior                              |
| 38 | Torun, Ayse Ozbil; Northumbria University - City Campus, Sport,          |
| 39 | Exercise and Rehabilitation                                              |
| 40 | Palumbo, Federico; University of Rome 'Foro Italico'                     |
| 41 | Popovic, Stevo; University of Montenegro; Western Balkan Sport           |
| 42 | Innovation Lab                                                           |
| 43 | Prieske, Olaf; University of Applied Sciences for Sport and Management   |
| 44 | Potsdam                                                                  |
| 45 | Puharic, Zrinka; Bjelovar University of Applied Sciences                 |
| 46 | Ribeiro, José Carlos; Faculty of Sports - University of Porto, Research  |
| 47 | Centre in Physical Activity, Health and Leisure                          |
| 48 | Rumbold, Penny; Northumbria University                                   |
| 49 | Sandu, Petru; National Institute of Public Health in Romania             |
| 50 | Sorić, Maroje; University of Zagreb                                      |
| 51 | Stavnsbo, Mette; University of Agder                                     |
| 52 | Syrmpas, Ioannis; University of Thessaly                                 |
| 53 | van der Ploeg, Hidde; Amsterdam University Medical Centres, Vrije        |
| 54 | Universiteit Amsterdam, Department of Public and Occupational Health,    |
| 55 | Amsterdam Public Health Institute                                        |
| 56 | Van Hoye, Aurélie; University of Limerick                                |
| 57 | Vilela, Sofia; University of Porto Institute of Public Health            |
| 58 | Woods, Catherine; University of Limerick, Physical education and sport   |
| 59 | sciences                                                                 |
| 60 | Wunsch, Kathrin; Karlsruhe Institute of Technology                       |
|    | Caprinica, Laura; University of Rome 'Foro Italico'                      |
|    | MacDonncha, Ciaran; University of Limerick, Centre for Physical Activity |
|    | and Health Research                                                      |
|    | Ling, Fiona ; Northumbria University                                     |

|                                  |                                                                                                                  |
|----------------------------------|------------------------------------------------------------------------------------------------------------------|
| <b>Primary Subject Heading</b> : | Public health                                                                                                    |
| Secondary Subject Heading:       | Sports and exercise medicine                                                                                     |
| Keywords:                        | PUBLIC HEALTH, Health policy < HEALTH SERVICES ADMINISTRATION & MANAGEMENT, Community child health < PAEDIATRICS |
|                                  |                                                                                                                  |

SCHOLARONE™  
Manuscripts

**TITLE**

DE-PASS Best Evidence Statement (BEST) – Modifiable determinants of physical activity and sedentary behaviour in children and adolescents aged 5-19 years: A protocol for systematic review and meta-analysis

**AUTHORS**

Mohammed Khudair\*, Anna Marcuzzi, Kwok Ng, Gavin Daniel Tempest, František Bartoš, Ratko Peric, Maximilian Maier, Flavia Beccia, Stefania Boccia, Mirko Brandes, Greet Cardon, Angela Carlin, Carolina Castagna, Helmi Chaabene, Anna Chalkley, Simone Ciaccioni, Joanna Cieślińska-Świder, Vilma Čingienė, Cristina Cortis, Chiara Corvino, Eco de Geus, Angela Di Baldassarre, Andrea Di Credico, Patrik Drid, Rosa M<sup>a</sup> Fernández Tarazaga, Francesca Gallè, Esther García Sánchez, Mekdes Gebremariam, Barbara Ghinassi, Marios Goudas, Grainne Hayes, Samuel Honorio, Pascal Izzicupo, Henriette Jahre, Judith Jelsma, Petra Juric, Athanasios Kolovelonis, Atle Kongsvold, Evangelia Kouidi, Fiona Mansergh, Bojan Masanovic, Teferi Mekonnen, Paul Jarle Mork, Marie Murphy, Kelly O'Hara, Ayse Ozbil Torun, Federico Palumbo, Stevo Popovic, Olaf Prieske, Zrinka Puharic, Jose Ribeiro, Penny Louise Sheena Ruimbold, Petru Sandu, Maroje Sorić, Mette Stavnsbo, Ioannis Sympas, Hidde P. Van Der Ploeg, Aurélie Van Hoye, Sofia Vilela, Catherine Woods, Kathrin Wunsch, Laura Capranica, Ciaran MacDonncha, Fiona Chun Man Ling, On behalf of DE-PASS

\*Correspondence: Mohammed Khudair, mohammed2.khudair@northumbria.ac.uk, Department of Sport, Exercise and Rehabilitation, Northumbria University, UK \*Correspondence: Room NBD 431, College Ln, Newcastle upon Tyne NE1 8SG; [mohammed2.khudair@northumbria.ac.uk](mailto:mohammed2.khudair@northumbria.ac.uk)

Anna Marcuzzi, anna.marcuzzi@ntnu.no, Department of Public Health and Nursing, Norwegian University of Science and Technology (NTNU), Norway

Kwok Ng, kwok.ng@uef.fi, School of Educational Sciences and Psychology, University of Eastern Finland, Finland; Department of Physical Education and Sport Sciences, University of Limerick, Ireland

Gavin Daniel Tempest, gavin.tempest@northumbria.ac.uk, Department of Sport, Exercise and Rehabilitation, Northumbria University, UK

František Bartoš, f.bartos96@gmail.com, Department of Psychology, University of Amsterdam, the Netherlands

Ratko Peric, ratkoperic@yahoo.com, Exercise Physiology Laboratory, OrthoSport Banja Luka, Bosnia

Maximilian Maier, maximilianmaier0401@gmail.com, University College London, UK

Flavia Beccia, flavia.beccia@gmail.com, Department of Psychology, Università Cattolica del Sacro Cuore, Italy

Stefania Boccia, stefania.boccia@unicatt.it, Department of Psychology, Università Cattolica del Sacro Cuore, Italy

Mirko Brandes, brandes@leibniz-bips.de, Department of Prevention and Evaluation, Leibniz Institute for Prevention Research and Epidemiology (BIPS), Germany

- 1  
2  
3 36 Greet Cardon, Greet.Cardon@UGent.be, Department of Movement and Sports Sciences, Ghent  
4 37 University, Belgium  
5  
6 38 Angela Carlin, a.carlin1@ulster.ac.uk, Centre for Exercise Medicine, Physical Activity and Health,  
7 39 Sport and Exercise Sciences Research Institute, University of Ulster, Jordanstown Campus, UK  
8  
9 40 Carolina Castagna, carolina.castagna@gmail.com, Department of Psychology, Università Cattolica del  
10 41 Sacro Cuore, Italy  
11  
12 42 Helmi Chaabene, chaabanelmi@hotmail.fr, Department of Sports and Health Sciences, Faculty of  
13 43 Human Sciences, University of Potsdam, Germany; High Institute of Sports and Physical Education of Kef,  
14 44 University of Jendouba, Tunisia  
15  
16 45 Anna Chalkley, Anna.Chalkley@hvl.no, Center for Physically Active Learning, Faculty of Education,  
17 46 Arts and Sports, Western Norway University of Applied Sciences, Norway; Faculty of Health Studies,  
18 47 University of Bradford, UK  
19  
20 48 Simone Ciaccioni, simoneciaccioni@yahoo.it, Department of Movement, Human and Health  
21 49 Sciences, University of Rome "Foro Italico", Italy  
22  
23 50 Joanna Cieślińska-Świder, j.cieslinska-swider@awf.katowice.pl, The Jerzy Kukuczka Academy of  
24 51 Physical Education in Katowice Poland, Department of Physiotherapy, Poland  
25  
26 52 Vilma Čingienė, v.cingiene@mruni.eu, Institute of Leadership and Strategic Management, Faculty of  
27 53 Public Governance and Business, Mykolas Romeris University, Lithuania  
28  
29 54 Cristina Cortis, c.cortis@unicas.it, Department of Human Sciences, Society and Health, University of  
30 55 Cassino and Lazio Meridionale, Italy  
31  
32 56 Chiara Corvino, chiara.corvino1@unicatt.it, Department of Psychology, Università Cattolica del Sacro  
33 57 Cuore, Italy  
34  
35 58 Eco de Geus, eco.de.geus@vu.nl, Department of Biological Psychology Vrije Universiteit Amsterdam,  
36 59 The Netherlands; Amsterdam Public Health research institute, UMC Amsterdam, The Netherlands  
37  
38 60 Angela Di Baldassarre, angela.dibaldassarre@unich.it, Department of Medicine and Aging Sciences,  
39 61 University "G. d'Annunzio" of Chieti-Pescara, Italy  
40  
41 62 Andrea Di Credico, andrea.dicredico@unich.it, Department of Medicine and Aging Sciences,  
42 63 University "G. d'Annunzio" of Chieti-Pescara, Italy  
43  
44 64 Patrik Drid, patrikdrid@gmail.com, Faculty of Sport and Physical Education, University of Novi Sad,  
45 65 Serbia  
46  
47 66 Rosa M<sup>a</sup> Fernández Tarazaga, tarazagarose@gmail.com, Fundación para la Formación e Investigación  
48 67 Sanitarias de la Región de Murcia, Spain  
49  
50 68 Francesca Gallè, francesca.galle@uniparthenope.it, Department of Movement Sciences and  
51 69 Wellbeing, University of Naples Parthenope, Italy  
52  
53 70 Esther García Sánchez, garciasanchezesther10@gmail.com, Fundación para la Formación e  
54 71 Investigación Sanitarias de la Región de Murcia, Spain  
55  
56 72 Mekdes Gebremariam, mekdes.gebremariam@medisin.uio.no, Department of Community Medicine  
57 73 and Global Health, Institute of Health and Society, University of Oslo, Norway  
58  
59  
60

- 1  
2  
3 74 Barbara Ghinassi, b.ghinassi@unich.it, Department of Medicine and Aging Sciences, University "G.  
4 75 d'Annunzio" of Chieti-Pescara, Italy  
5  
6 76 Marios Goudas, mgoudas@pe.uth.gr, Department of Physical Education and Sport Science,  
7 77 University of Thessaly, Greece  
8  
9 78 Grainne Hayes, grainne.hayes@ul.ie, Department of Sport and Early Childhood Studies, Technological  
10 79 University of the Shannon: Midlands Midwest, Moylish Campus, Ireland; Physical Activity for Health  
11 80 Research Cluster, Health Research Institute, University of Limerick, Ireland  
12  
13 81 Samuel Honorio, samuelhonorio@hotmail.com, Polytechnic Institute of Castelo Branco, Portugal  
14  
15 82 Pascal Izzicupo, pascal.izzicupo@unich.it, Department of Medicine and Aging Sciences, University "G.  
16 83 d'Annunzio" of Chieti-Pescara, Italy  
17  
18 84 Henriette Jahre, henriett@oslomet.no, Department of Physiotherapy, Oslo Metropolitan University,  
19 85 Norway  
20  
21 86 Judith Jelsma, j.jelsma@amsterdamumc.nl, Amsterdam UMC, Vrije Universiteit Amsterdam,  
22 87 Department of Public and Occupational Health, Amsterdam Public Health Research Institute, The  
23 88 Netherlands  
24  
25 89 Petra Juric, petra.juric@kif.hr, Faculty of Kinesiology, University of Zagreb, Croatia  
26  
27 90 Athanasios Kolovelonis, akolov@pe.uth.gr, Department of Physical Education and Sport Science,  
28 91 University of Thessaly, Greece  
29  
30 92 Atle Kongsvold, atle.m.kongsvold@ntnu.no, Department of Public Health and Nursing, Norwegian  
31 93 University of Science and Technology (NTNU), Norway  
32  
33 94 Evangelia Kouidi, kouidi@phed.auth.gr, Laboratory of Sports Medicine, Department of Physical  
34 95 Education and Sports Science, Aristotle University of Thessaloniki, Greece  
35  
36 96 Fiona Mansergh, Fiona\_Mansergh@health.gov.ie, Health and Wellbeing Programme, Department of  
37 97 Health, Ireland  
38  
39 98 Bojan Masanovic, bojanma@ucg.ac.me, Faculty for Sport and Physical Education, University of  
40 99 Montenegro, Montenegro; Montenegrosport, Montenegro; Montenegrin Sports Academy,  
41 100 Montenegro  
42  
43 101 Teferi Mekonnen, t.m.yitayew@medisin.uio.no, Department of Nutrition, Institute of Basic Medical  
44 102 Sciences, Faculty of Medicine, University of Oslo, Norway  
45  
46 103 Paul Jarle Mork, paul.mork@ntnu.no, Department of Public Health and Nursing, Norwegian  
47 104 University of Science and Technology (NTNU), Norway  
48  
49 105 Marie Murphy, mh.murphy@ulster.ac.uk, Doctoral College, Ulster University, UK  
50  
51 106 Kelly O'Hara, ohara@ubi.pt, Sport Science Department, University Beira Interior, Portugal  
52  
53 107 Ayse Ozbil Torun, ayse.torun@northumbria.ac.uk, Department of Architecture and Built  
54 108 Environment, Northumbria University, UK  
55  
56 109 Federico Palumbo, f.palumbo1@studenti.uniroma4.it, Department of Movement, Human and Health  
57 110 Sciences, University of Rome "Foro Italico", Italy  
58  
59  
60



- 1  
2  
3 111 Stevo Popovic, stevop@ucg.ac.me, Faculty for Sport and Physical Education, University of  
4 112 Montenegro, Montenegro; Western Balkan Sport Innovation Lab, Montenegro  
5  
6 113 Olaf Prieske, prieske@fhsmg.de, University of Applied Sciences for Sports and Management  
7 114 Potsdam, Germany  
8  
9 115 Zrinka Puharic, zpuharic@vub.hr, University of Applied Sciences Bjelovar, Croatia; Faculty of dental  
10 116 medicine and health Osijek, Croatia  
11  
12 117 Jose Ribeiro, jribeiro@fade.up.pt, Faculty of Sport, University of Porto, Portugal  
13  
14 118 Penny Louise Sheena Ruimbold, penny.rumbold@northumbria.ac.uk, Department of Sport, Exercise  
15 119 and Rehabilitation, Northumbria University, UK  
16  
17 120 Petru Sandu, petru.sandu@insp.gov.ro, National Institute of Public Health in Romania, Romania  
18  
19 121 Maroje Sorić, masoric@kif.hr, Faculty of Kinesiology, University of Zagreb, Croatia; Faculty of Sport,  
20 122 University of Ljubljana, Slovenia  
21  
22 123 Mette Stavnsbo, Mette.Stavnsbo@uia.no, Department of Sport Science and Physical Education,  
23 124 Faculty of Health and Sport Sciences, University of Agder, Norway  
24  
25 125 Ioannis Syrmipas, jsyrmipas@gmail.com, Department of Physical Education and Sport Sciences,  
26 126 University of Thessaly, Greece  
27  
28 127 Hidde P. Van Der Ploeg, hp.vanderploeg@amsterdamumc.nl, Amsterdam UMC, Vrije Universiteit  
29 128 Amsterdam, Department of Public and Occupational Health, Amsterdam Public Health Research  
30 129 Institute, The Netherlands  
31  
32 130 Aurélie Van Hoye, aurelie.vanhoye@ul.ie, Physical Activity for Health Cluster, Health Research  
33 131 Institute, Department of Physical Education and Sport Sciences, University of Limerick, Ireland  
34  
35 132 Sofia Vilela, sofia.vilela@ispup.up.pt, EPIUnit - Institute of Public Health, University of Porto,  
36 133 Portugal; Laboratory for Integrative and Translational Research in Population Health (ITR), Portugal  
37  
38 134 Catherine Woods, Catherine.Woods@ul.ie, Physical Activity for Health Cluster, Health Research  
39 135 Institute, Department of Physical Education and Sport Sciences, University of Limerick, Ireland  
40  
41 136 Kathrin Wunsch, kathrin.wunsch@gmx.de, Institute of Sports and Sports Science, Karlsruhe Institute  
42 137 of Technology, Germany  
43  
44 138 Laura Capranica, laura.capranica@uniroma4.it, Department of Movement, Human and Health  
45 139 Sciences, University of Rome "Foro Italico", Italy  
46  
47 140 Ciaran MacDonncha, ciaran.macdonncha@ul.ie, Physical Activity for Health Research Cluster, Health  
48 141 Research Institute, University of Limerick, Ireland  
49  
50 142 Fiona Chun Man Ling, f.ling@northumbria.ac.uk, Department of Sport, Exercise and Rehabilitation,  
51 143 Northumbria University, UK  
52  
53 144 **Word count:**  
54  
55 145 Abstract – 294 (250-300 required); Main text – 3805 (max 4000); Tables: 1  
56  
57 146 **Keywords:**  
58 147 Physical activity, sedentary behaviour, children, adolescents, determinants  
59  
60

1  
2  
3 148 **ABSTRACT**

4 149 **Introduction:** Physical activity among children and adolescents remains insufficient, despite the  
5  
6 150 substantial efforts made by researchers and policymakers. Identifying and furthering our  
7  
8 151 understanding of potential modifiable determinants of physical activity behaviour (PAB) and sedentary  
9  
10 152 behaviour (SB) is crucial for the development of interventions that promote a shift from SB to PAB. The  
11  
12 153 current protocol details the process through which a series of systematic literature reviews (SLRs) and  
13  
14 154 meta-analyses (MAs) will be conducted to produce a best-evidence statement (BEST) and inform policy  
15  
16 155 makers. The overall aim is to identify modifiable determinants that are associated with changes in PAB  
17  
18 156 and SB in children and adolescents (aged 5-19 years) and to quantify their effect on, or association  
19  
20 157 with, PAB/SB.

21 158 **Methods and analysis:** A search will be performed in MEDLINE, SportDiscus, Web of Science,  
22  
23 159 PsychINFO and Cochrane Central Register of Controlled Trials. Randomized controlled trials (RCTs) and  
24  
25 160 controlled trials (CTs) that investigate the effect of interventions on PAB/SB and longitudinal studies  
26  
27 161 that investigate the associations between modifiable determinants and PAB/SB at multiple time points  
28  
29 162 will be sought. Risk of bias assessments will be performed using adapted versions of Cochrane's RoB  
30  
31 163 2.0 and ROBINS-I tools for RCTs and CTs, respectively, and an adapted version of the National Institute  
32  
33 164 of Health's tool for longitudinal studies. Data will be synthesised narratively and, where possible, MAs  
34  
35 165 will be performed using frequentist and Bayesian statistics. Modifiable determinants will be discussed  
36  
37 166 considering the settings in which they were investigated and the PAB/SB measurement methods used.

38 167 **Ethics and dissemination:** No ethical approval is needed as no primary data will be collected. The  
39  
40 168 findings will be disseminated in peer-reviewed publications and academic conferences where possible.  
41  
42 169 The BEST will also be shared with policy makers within the DE-PASS consortium in the first instance.

43  
44 170 **Systematic review registration:** CRD42021282874  
45  
46  
47  
48  
49  
50  
51  
52  
53  
54  
55  
56  
57  
58  
59  
60

1  
2  
3 172 **Strengths and limitations of this study**

- 4 173 • Modifiable determinants will be summarized and described within the settings in which they  
5  
6 174 were investigated to contextualize how they interact with other determinants and  
7  
8 175 subsequently affect physical activity and sedentary behaviour in children and adolescents.
- 9 176 • The body of evidence from high quality research will be summarised, accounting for  
10  
11 177 differences in study designs, methodological quality and measurement methods of physical  
12  
13 178 activity and sedentary behaviour of children and adolescents.
- 14 179 • Bayesian meta-analysis will be used in addition to frequentist meta-analysis to allow for  
15  
16 180 assessment of the plausibility of the results and provide more nuanced conclusions regarding  
17  
18 181 the effectiveness of physical activity and sedentary behaviour interventions in children and  
19  
20 182 adolescents.
- 21 183 • Modifiable determinants reported in study designs which are not included in the current works  
22  
23 184 may be overlooked and should be investigated in future reviews as they may provide insights  
24  
25 185 into potentially effective interventions.
- 26 186 • While our aim is to quantify the effect of modifiable determinants on physical activity and  
27  
28 187 sedentary behaviour of children and adolescents, the analyses of most included studies might  
29  
30 188 not permit the quantification, thus a narrative approach will be adopted.

31  
32 189

33  
34 190  
35  
36  
37  
38  
39  
40  
41  
42  
43  
44  
45  
46  
47  
48  
49  
50  
51  
52  
53  
54  
55  
56  
57  
58  
59  
60

## 191 INTRODUCTION

192 Physical inactivity among children and adolescents is a global public health issue. Four in five (81%)  
193 adolescents across the world do not meet the World Health Organisation's (WHO) physical activity (PA)  
194 guidelines.[1,2] Physical inactivity is a contributing factor to the high prevalence of cardiovascular,  
195 metabolic and bone-health related conditions.[3] Reducing levels of physical inactivity from a young  
196 age has a positive impact on physical and mental health as children and adolescents transition into  
197 adulthood.[4] It is therefore important to promote physical activity behaviour (PAB) and minimize  
198 sedentary behaviour (SB) as part of a healthy lifestyle in children and adolescents to mitigate the  
199 negative effects of physical inactivity.[5] In the global action plan on PA 2018–2030, the WHO adopted  
200 a target to reduce physical inactivity worldwide by 15% by 2030.[6] To achieve this target, evidence-  
201 based policies need to be created and adopted worldwide.[7] Furthermore, the fact that PA guidelines  
202 are currently not met in a large proportion of young people points towards a lack of understanding  
203 and insufficient translation of the evidence behind what makes children and adolescents physically  
204 active into policy and public interventions.[9,10] Therefore, a better understanding of the  
205 determinants of PAB/SB is a crucial first step in developing interventions that lead to a sustained  
206 increase in PAB and reduced SB and a foundation for PA policy development.[8,11] In the current  
207 protocol, we refer to 'determinants' of PAB or SB as mechanisms that drive and explain behaviour  
208 adaptation in specific contexts.[11,12] We focus on modifiable determinants, signifying those which  
209 are malleable and can be altered through interventions, and present opportunities to intervene from  
210 public health and policy perspectives.[11,13] Using a rigorous methodology, our goal is to synthesise  
211 high-quality evidence on the effectiveness and association of key modifiable determinants on PAB/SB  
212 and produce a Best Evidence Statement (BEST) which can inform future interventions. We also aim to  
213 identify the settings for interventions that are most readily translatable to policy.

214 The current evidence of the effectiveness of modifiable determinants on PAB/SB is fragmented due to  
215 considerable variations in the methodologies used and the methodological quality across the available  
216 studies, which has contributed to largely inconclusive findings in systematic literature reviews (SLRs)  
217 and meta-analyses (MAs).[8–10,13–18] To limit the variations across studies and extract trustworthy  
218 evidence, it is important to identify high-quality studies. Factors that contribute to methodological  
219 quality include research design and PAB/SB measurement methods. A range of research designs have  
220 been applied in existing PA research (e.g., cross-sectional, longitudinal, randomised controlled trials  
221 (RCTs) and controlled trials (CTs). Potential causality between modifiable determinants and the  
222 outcome measures can be indicated by RCTs and CTs, and well-designed RCTs can minimise bias  
223 through randomisation and intention-to-treat analyses.[8,19,20] However, challenges in  
224 randomisation of PAB/SB interventions have been recognised,[21] therefore, CTs might be the next

1  
2  
3 225 most credible alternative. Whilst RCTs are regarded as the 'gold standard', high-quality longitudinal  
4  
5 226 studies can provide indications of a causal relationship between modifiable determinants and the  
6  
7 227 outcome measures by virtue of the repeated measurements over time.[9] Furthermore, RCTs and CTs  
8  
9 228 can be short-lasting and may not capture the prolonged exposures that can be explored in longitudinal  
10  
11 229 follow-ups.[8] Therefore, we consider RCTs, CTs and longitudinal studies to be amongst the highest  
12  
13 230 quality of evidence appropriate to develop the BESt.

14 231 Methods for measurement of PAB/SB contribute to the disparities in the methodologies used between  
15  
16 232 studies. Data obtained from self-report methods are generally considered to be less sensitive to  
17  
18 233 change than data obtained via device-based methods due to recall errors, under-/overestimation or  
19  
20 234 interpretation discrepancies.[14,15,22,23] On the one hand, device-based measurements are deemed  
21  
22 235 to be more sensitive to behaviour change and can detect cognitively salient behaviours, such as time  
23  
24 236 spent in SB.[23] On the other hand, many studies rely on self-report measurements as they are less  
25  
26 237 costly, logistically easier to implement and are more applicable in some domains of behaviour (e.g.,  
27  
28 238 strength training) than device-based measurements.[23] Given that both device-based and self-report  
29  
30 239 methods present strengths and weaknesses, we consider it methodologically appropriate to include  
31  
32 240 both in BESt, provided that validity and reliability of the instruments are assessed and reported  
33  
34 241 thoroughly in the included studies. However, as previous research has shown low levels of agreement  
35  
36 242 between the two measurement methods, we will conduct separate analyses per method within SLRs  
37  
38 243 and MAs.[24]

39  
40 244 Over the years, PAB/SB measurements have been used to assess different forms of PA, such as  
41  
42 245 structured PA (e.g., physical education), leisure-time PA and active transport PA, and different domains  
43  
44 246 where sedentary time is spent, such as screen-based activities (e.g., doing homework on computers),  
45  
46 247 leisure-based activities (e.g., sitting and reading), and transport-related activities (e.g., sitting in a  
47  
48 248 bus).[15] Recently, there has been an increased emphasis on identifying the settings (or contexts) in  
49  
50 249 which PAB/SB take place and the determinants at work within the settings, so that the settings of the  
51  
52 250 most impactful, modifiable determinants can be targeted when translating research into policy.[9,25]  
53  
54 251 Answering the questions about what works for whom (children and/or adolescents), why  
55  
56 252 (determinants and their interactions) and when/where (settings) is critical to advance our  
57  
58 253 understanding of the implementation and possible effectiveness of interventions.[26] Therefore, to  
59  
60 254 produce the BESt, we aim to investigate the modifiable determinants in their respective settings in  
255  
256 SLRs and MAs so that our results can inform future interventions within settings that speak to policy  
makers.

1  
2  
3 257 The current protocol will be used to produce a series of SLRs and MAs aiming to investigate the  
4  
5 258 effectiveness of modifiable determinants on PAB/SB in children and adolescents using high-quality  
6  
7 259 evidence available. Investigating the modifiable determinants of PAB/SB in their respective settings  
8  
9 260 will help contextualize their modifiability and effect. Therefore, to produce the BEST, it is important to  
10  
11 261 ascertain methodological rigour which is set apart from previous efforts in understanding PAB/SB  
12  
13 262 determinants in children and adolescents. By considering the settings of the modifiable determinants,  
14  
15 263 our results can readily inform policy makers and future PA interventions.

### 264 **Objectives**

265 The overarching aim of the proposed SLRs and MAs is to identify modifiable determinants that are  
266 associated with changes in PAB and SB in children and adolescents (aged 5-19). Specific aims are:

- 267 • To investigate which modifiable determinants of PAB and SB have been targeted in  
268 interventions designed to promote PA in children and adolescents in RCTs and CTs.
- 269 • To investigate which modifiable determinants are associated with PAB and SB in children and  
270 adolescents in longitudinal studies.
- 271 • To investigate the strength of the association between such modifiable determinants and  
272 PAB/SB in children and adolescents.

### 273 **METHODS AND ANALYSIS**

274 The current protocol was registered in the International prospective register of systematic reviews  
275 (PROSPERO) on 12/10/2021 with the registration number: CRD42021282874. The reporting in the  
276 current protocol manuscript was guided by the Preferred Reporting Items for Systematic Review and  
277 Meta-Analysis Protocols (PRISMA-P).[27]

278 The modifiable determinants that have been targeted in all included studies will be listed and analysed  
279 narratively in SLRs. Meta-analytic methods will be applied to the data from intervention and  
280 longitudinal studies. Analyses will be performed for different categories of studies based on (i)  
281 methods for measurement of PAB/SB (e.g., self-report, device-based) and (ii) age (e.g., children aged  
282 5-12 years, adolescents aged 12-19 years) in a series of SLRs and MAs with varying focus. Study settings  
283 (e.g., school, home, community) will also be identified.

### 284 **Population**

285 Studies targeting children and adolescents with and without disabilities aged 5-19 years will be  
286 included. According to the International Classification of Functioning, Disability and Health (ICF)[28],  
287 disability is an umbrella term for impairments, activity limitations and participation restrictions,  
288 denoting the negative aspects of the interaction between an individual and that individual's contextual  
289 factors. Studies that include children and/or adolescents with any reported ongoing diagnosed medical

1  
2  
3 290 conditions known to affect PA participation and includes patients under treatment on all levels of care  
4  
5 291 will be excluded (e.g., studies including cancer patients or individuals with anterior cruciate ligament  
6  
7 292 injury, or studies where the intervention takes place in a clinical setting). Studies that report data for  
8  
9 293 ages exceeding the specified age range will be excluded, unless data for a sub-group within the eligible  
10  
11 294 mean age can be extracted.

### 12 295 **Types of studies**

13 296 We will include studies examining modifiable PAB/SB determinants in RCTs, CTs and longitudinal  
14  
15 297 studies. RCTs and CTs that investigate the effectiveness of interventions aiming to promote PA or  
16  
17 298 reduce SB in children and adolescents, should include control groups or other intervention groups, that  
18  
19 299 are matched to the experimental groups, and report pre- and post-intervention measurements of both  
20  
21 300 outcome measures and modifiable determinants. Longitudinal studies should investigate the  
22  
23 301 association between modifiable determinants of PA and PAB/SB in children and adolescents and report  
24  
25 302 measurements of both the modifiable determinants and PAB/SB at least at two time-points. No control  
26  
27 303 groups or comparisons will be required for the longitudinal studies. Length of follow-up or length of  
28  
29 304 intervention in any of the study designs will not be restricted, data will be extracted if reported for  
30  
31 305 participants within the specified age range (5-19 years).

### 32 306 **Outcomes**

33 307 The main outcome measures targeted in the current protocol are PAB and SB. Physical activity is  
34  
35 308 defined as any bodily movement produced by skeletal muscles that requires energy expenditure, thus  
36  
37 309 including any modality of movement at any intensity.[2] As such, PAB encompasses behaviours of  
38  
39 310 sedentary, light, moderate and vigorous intensity PA and SB includes any waking behaviour  
40  
41 311 characterised by an energy expenditure of 1.5 METs or lower while sitting, reclining or lying.[2,29]  
42  
43 312 Therefore, we will categorise PAB into light, moderate and vigorous intensity and SB-based types of  
44  
45 313 activities reported in the included studies. Any of the two types of measurement methods for PAB/SB,  
46  
47 314 including self-report methods (e.g., questionnaires, diaries, recall), and device-based methods (e.g.,  
48  
49 315 accelerometers, pedometers) will be included.[23] Moreover, we target studies which have reported  
50  
51 316 modifiable determinants as secondary measures. Modifiable determinants will be identified based on  
52  
53 317 the context of each study, where manipulation of the determinant is hypothesized to have an effect  
54  
55 318 on PAB/SB. Where possible, we will explore the mediating effect of the modifiable determinants in the  
56  
57 319 changes in PAB/SB by analysing the structural relationship between the modifiable determinants and  
58  
59 320 PAB/SB.

### 56 321 **Comparators**

57 322 The main comparator will include PAB/SB measurement methods. The included studies will comprise  
58  
59 323 those adopting self-report or device-based measures of PAB/SB or both as outcome measures. Self-

324 report and device-based measures will be analysed separately. In studies where both device-based  
 325 and self-report measures are reported, the data for both measurement methods will be extracted and  
 326 analysed separately. In addition, to strengthen the BESt, results from the respective measurement  
 327 methods will be compared to provide further indication of the strength of the evidence yielded from  
 328 studies, depending on their measurement methods for PAB/SB. Classification of the settings in which  
 329 the modifiable determinants were targeted will be identified once data have been extracted.

### 330 **Search strategy**

331 A search will be performed in MEDLINE (Ovid), PsycINFO (EBSCO), Web of Science, Sport Discus, and  
 332 Cochrane Central Register of Controlled Trials (CENTRAL). The piloted search strategy is presented in  
 333 Table 1. The search strategy is built using the main outcome measures of (1) PAB and (2) SB, and  
 334 synonyms of PAB/SB that are commonly used in PA research; (3) the targeted study designs (i.e., RCTs,  
 335 CTs and longitudinal studies) and related terms; (4) determinant and synonyms that are commonly  
 336 used in PA research; (5) the targeted population, to identify children and adolescents and synonyms  
 337 that are commonly used in PAB/SB research; and (6) measurement methods for PAB/SB such as  
 338 accelerometer or pedometer for device-based methods and diary and activity recall for self-report  
 339 methods.

340 For languages other than English, studies will be included if an English version is available, or if a  
 341 translation can be obtained through members of the review team. We will include studies published  
 342 from 2010 - which was the year when the first global PA guidelines were published by WHO[30] and  
 343 around the time previous SLRs with similar aims were published.[31,32] Only peer-reviewed studies  
 344 will be included and grey literature such as research reports, working papers, conference proceedings  
 345 and theses will be excluded during the search and at the initial screening of the studies.

346 Table 1. The search terms, Boolean commands and field indicators, presented for each domain.

| Domain                                                  | Search terms                                                                                                                                                                                                                |
|---------------------------------------------------------|-----------------------------------------------------------------------------------------------------------------------------------------------------------------------------------------------------------------------------|
| Outcome:<br>Physical activity<br>behaviour <sup>1</sup> | ("Physical activ*") OR (exercise) OR (sport*) OR (play) OR (exertion) OR<br>(recreation) OR (training) OR ("motor activit*") OR ("physical performance")<br>OR ("physical movement") OR ("physical effort") OR (exergaming) |
| <b>OR</b>                                               |                                                                                                                                                                                                                             |
| Outcome:<br>Sedentary<br>behaviour <sup>1</sup>         | (sedentar*) OR ("screen time") OR (gaming) OR ("computer use") OR (sitting)<br>OR (inactiv*) OR ("seated posture") OR ((watch* or view*) N/2 (TV or<br>television))                                                         |
| <b>AND</b>                                              |                                                                                                                                                                                                                             |
| Target<br>population <sup>1</sup>                       | (child*) OR (youth) OR (adolescen*) OR ("young people") OR ("school age*")<br>OR (p?ediatric) OR (juvenile) OR (teen*)                                                                                                      |
| <b>AND</b>                                              |                                                                                                                                                                                                                             |
| Study design <sup>2</sup>                               | (RCT) OR ("control* trial*") OR (quasi) OR (longitudinal) OR (intervention*) OR<br>(prospective) OR ("follow up")                                                                                                           |
| <b>OR</b>                                               |                                                                                                                                                                                                                             |



|                                  |                                                                                                                                                                                                                                                 |
|----------------------------------|-------------------------------------------------------------------------------------------------------------------------------------------------------------------------------------------------------------------------------------------------|
| Determinants <sup>2</sup>        | (determinant*) OR (antecedent*) OR (predictor*) OR (mediator*) OR (moderator*) OR (exposure*)                                                                                                                                                   |
| <b>AND</b>                       |                                                                                                                                                                                                                                                 |
| Measurement methods <sup>2</sup> | (acceleromet*) OR ("activity profile") OR (recall) OR (diary) OR ("activity monitor*") OR ("heart rate monitor*") OR ("direct observation") OR (actigraph*) OR ("activity track*") OR ("self report*") OR (survey) OR (pedomet*) OR (wearable*) |

<sup>1</sup>Restricted search to title, abstract and keywords

<sup>2</sup>Search in entire study

347

### 348 **Study records**

349 At the initial screening, records of grey literature and duplicates from the different databases will be  
 350 excluded. The initial screening will be performed before the start of the blinded review process by one  
 351 member of the review team. For this, EndNote x9[33] – a reference management software will be  
 352 used. The same member of the review team will upload the resulting list to Covidence[34] – an online  
 353 tool for SLRs in which the blinded review process, including title and abstract screening, full-text  
 354 screening, study selection, data extraction and risk of bias assessment, will be completed. Covidence  
 355 allows the distribution of studies among several reviewers in a process based on the PRISMA flow  
 356 diagram for SLRs.[35]

357 Several workshops will be held before the commencement of the respective stages (i.e. study  
 358 screening, risk of bias assessments and data extraction) to ensure that all reviewers will be proficient  
 359 in the procedures and to ensure agreement among them. As the review team consists of 31 members,  
 360 an online communication tool – Slack[36] – will be used to maintain communication among the  
 361 members of the review team throughout the review process to respond to queries and provide  
 362 updates on the process. A core group of the review team will guide and support the review team  
 363 members throughout the review process.

### 364 **Screening process**

365 At title and abstract screening and full-text screening, each study will be screened by two blinded  
 366 independent reviewers of the review team. Any conflicts between the independent reviewers will be  
 367 resolved by a third reviewer, who is a member of the core group. An equal number of studies will be  
 368 distributed among reviewers and random studies are selected by Covidence to be distributed to each  
 369 reviewer. At the first stage, titles and abstracts will be assessed for eligibility using a pre-piloted  
 370 decision tree based on the inclusion/exclusion criteria expected to be found in either the title or  
 371 abstract. The full-text version of the studies that remain after title and abstract screening will then be  
 372 uploaded to Covidence. At the second stage, full texts will be assessed for eligibility using the full  
 373 inclusion/exclusion criteria. Reasons for exclusion of studies at the full-text stage will be recorded.  
 374 Following the full-text screening, the included studies will be checked by one reviewer to exclude any

1  
2  
3 375 duplicate reporting, that is, reporting of the results from the same sample in multiple studies or studies  
4 376 that have been published more than once. For this purpose, study information will be compared  
5 377 between studies, such as authors, study locations and settings, intervention content and design,  
6 378 sample size, demographic information and ethical committee approval number.[37] If duplicate  
7 379 reporting is detected among included studies, the reviewers will attempt to identify the main study  
8 380 which was duplicated. If the main study cannot be identified, the study with the longest follow-up or  
9 381 highest number of measurement time points will be selected for inclusion.[38,39]

#### 382 **Data extraction**

383 A data extraction form will be created in Covidence and piloted ahead of the data extraction stage. The  
384 data extraction from each study will be completed by two independent reviewers. If any information  
385 or data are missing, or if clarifications are needed, the corresponding author of the respective studies  
386 will be contacted. If a response is not provided before data extraction completes, or if the reporting  
387 remains incomplete, the study will be excluded. Following the independent data extraction, the two  
388 reviewers will perform a consensus procedure to resolve any conflicts and ascertain the correctness of  
389 the extracted data.

390 The data extracted will include the following items:

- 391 • Study/intervention description: Study design, brief study intervention description, description  
392 of intervention design and content, description of control group activity, study setting.
- 393 • Sample information: Sample size, sample age (including age by sex), sex (including grouping  
394 based on sex; % Male, % Female), population type (disability/non-disability).
- 395 • Outcome measures and modifiable determinants: PAB/SB outcome measurement method  
396 type (e.g., self-report, device-based) and instrument (e.g., ActiGraph, Youth Activity Profile, 7-  
397 day recall), length of device-based PAB/SB measurement (days), days of the week for device-  
398 based PAB/SB measurement (weekdays/weekend day), wear-time requirement for device-  
399 based PAB/SB measurement, unit of measure for PAB/SB, reported validity and reliability of  
400 PAB/SB measurements, modifiable determinant measurement instruments and their reported  
401 validity and reliability.
- 402 • Time frames: Intervention length (weeks), intervention location (country), number of  
403 measurement time points, length of follow-up (weeks).
- 404 • Results data: PAB/SB outcome data (mean, measures of variance), modifiable determinant  
405 data (mean, measures of variance).

**Risk of bias**

Different scales will be used for the assessment of risk of bias depending on the study design of each included study. For RCTs, a modified version of the Cochrane risk of bias tool for randomized trials (RoB 2.0) will be used.[40] For CTs without randomization, a modified version of Cochrane's Risk of Bias in Non-randomized Studies - of Interventions (ROBINS-I) will be used.[41] The Cochrane tools, RoB 2.0 and ROBINS-I, are modified to include an additional domain concerning the bias in measurement of the determinants. For longitudinal studies, an adapted version of the National Institutes of Health (NIH) quality assessment tool will be used.[42] The adaptation of the latter tool involves the exclusion/addition of items relevant to longitudinal studies, based on the tool used by Kontostoli et al.[43]

The two independent reviewers who extract the data from the respective studies will perform the risk of bias assessment to ensure familiarity with the studies. The risk of bias assessment will be completed in forms created in Covidence with the respective risk of bias tools as templates. Following the independent data extraction, the two reviewers will perform a consensus procedure to resolve any conflicts and ascertain the correctness of the assessment.

**Data synthesis**

Data extraction will yield a data file containing data for the included RCTs, CTs and longitudinal studies, and include populations with and without disabilities. A summary table will be created describing the overall characteristics of the included studies with information on the methods (i.e., intervention description for intervention studies/exposure for longitudinal studies), settings, modifiable determinants, sample characteristics (i.e., sample size, age), and outcomes (i.e., outcome measures, measure type, number of measures, measurement time points). Results of the risk of bias assessment will be reported in a separate table.[44]

Findings will be synthesised narratively to identify and list the modifiable determinants and the settings they were investigated in. Studies for disability and non-disability populations, and studies reporting PAB/SB measured using self-report and device-based methods will be discussed separately. The findings will be discussed considering the different settings and the quality of evidence included in the review.

Most data extracted from the included studies are expected to be continuous. Where possible, meta-analytic methods will be applied. MAs will be performed using both frequentist and Bayesian approaches to statistical inference in JASP statistics software.[45] MAs will be performed for intervention studies (RCTs and CTs) to investigate the effect of the interventions on PAB/SB and determinants and for longitudinal studies to investigate the strength of the association between

1  
2  
3 439 identified modifiable determinants and PAB/SB. For studies including more than one experimental  
4  
5 440 group or modifiable determinant, each will be included in the MAs.

6  
7 441 Direct effect will be investigated in frequentist pairwise comparisons, for which the standardized mean  
8  
9 442 difference (SMD) and the 95% confidence intervals (CI) will be calculated. We expect the presence of  
10  
11 443 heterogeneity among included studies in each MA due to the nature, settings or types of interventions.  
12  
13 444 Therefore, the MAs will be conducted using random effects models. For intervention studies, the post-  
14  
15 445 intervention data will be used to calculate the between-group difference while controlling for baseline  
16  
17 446 differences. For longitudinal studies, the within-group difference will be calculated as control groups  
18  
19 447 are not expected to be included in longitudinal studies. For data interpretation, effect size values of  
20  
21 448 SMD < 0.50 indicate small, of  $0.50 \leq \text{SMD} < 0.80$  indicate medium, and of  $\text{SMD} \geq 0.80$  indicate large  
22  
23 449 effects.[46] Heterogeneity will be identified using Cochrane's Q, which is based on a Chi-square test  
24  
25 450 using the confidence interval size in relation to the degrees of freedom. Heterogeneity will also be  
26  
27 451 quantified by using  $I^2$ , which represents the degree (in %) of methodological consistency across studies  
28  
29 452 using the Chi-square statistic Q in relation to the degrees of freedom. For interpretation of  
30  
31 453 heterogeneity,  $I^2 < 25\%$  indicates low heterogeneity,  $25\% < I^2 < 50\%$  indicates moderate heterogeneity,  
32  
33 454 and  $I^2 > 75\%$  indicates high heterogeneity.[47] Benchmarks will be used to give an approximation for  
34  
35 455 the level of heterogeneity: 0% to 40%: might not be important; 30% to 60%: may represent moderate  
36  
37 456 heterogeneity; 50% to 90%: may represent substantial heterogeneity; 75% to 100%: considerable  
38  
39 457 heterogeneity.[48] The level for statistical significance will be set to  $\alpha < 0.05$ .

40  
41 458 The Bayesian approach to statistical inference will be applied for the MAs using random effects models.  
42  
43 459 The primary benefits of using Bayesian meta-analysis in addition to frequentist meta-analysis include  
44  
45 460 (a) the ability to include prior knowledge of the effect into a model, updating the existing knowledge  
46  
47 461 as evidence accumulates (b) the ability to make more nuanced conclusions that expand on a simple  
48  
49 462 presence or absence of support for the hypotheses based on a p-value, and (c) the ability to assess the  
50  
51 463 plausibility of the results and to make conclusions based on the probability that the results are within  
52  
53 464 a given range.[49,50] For the Bayesian meta-analysis, Gibbs sampling of the Markov Chain Monte Carlo  
54  
55 465 (MCMC) algorithm will be used in JASP.[45] The probability for publication bias will also be calculated  
56  
57 466 using the JASP extension Robust Bayesian Meta-analysis (RoBMA). We will apply RoBMA to conduct  
58  
59 467 state of the art publication bias-adjusted MA.[51,52] The Bayesian framework will allow for Bayesian  
60  
468 model averaging,[49] taking several plausible models into account and alleviating concerns about  
469 selecting the right model from the variety of adjustment methods available.[53] In addition, RoBMA  
470 has several other benefits – it allows researchers to (1) quantify evidence on a continuous scale,  
471 including for the null, (2) avoid accumulation bias, and (3) ease estimation problems by using prior

1  
2  
3 472 distributions. We will use the prior specifications[51] and models with the modification of removing  
4  
5 473 the fixed-effects models.

6  
7 474 Additionally, the mediation effects of determinants on PAB/SB will be investigated using frequentist  
8  
9 475 meta-analytical structural equation modelling (meta-SEM).[54] To conduct meta-SEM, the covariance  
10  
11 476 structure of the mediation is required. If this information is not presented in a primary study, the  
12  
13 477 authors will be contacted. We will conduct meta-SEM only when we can extract the required data.

#### 14 15 478 **ETHICS AND DISSEMINATION**

16 479 The current protocol describes the process through which a series of SLRs and MAs will be performed,  
17  
18 480 with the aim to identify modifiable determinants that are (in)effective in influencing PAB and SB in  
19  
20 481 children and adolescents. The findings of the resultant studies will be disseminated in peer-reviewed  
21  
22 482 publications and academic conferences where possible. Modifiable determinants from studies with  
23  
24 483 different study designs and measured using self-report or device-based methods will be reported  
25  
26 484 separately in different publications. The BESt will also be shared with policy makers within the DE-PASS  
27  
28 485 consortium in the first instance. As no primary data will be collected, no ethical approval is required.  
29  
30  
31  
32  
33  
34  
35  
36  
37  
38  
39  
40  
41  
42  
43  
44  
45  
46  
47  
48  
49  
50  
51  
52  
53  
54  
55  
56  
57  
58  
59  
60

1  
2  
3 486 **Author contributions**

4  
5 487 The current systematic review protocol was produced by members of the COST Action CA19101  
6  
7 488 Determinants of Physical Activities in Settings (DE-PASS). The protocol was conceived and designed  
8  
9 489 by C.M., F.C.M.L., M.K., A.M., G.D.T. and K.N. The methodology was planned and outlined by C.M.,  
10  
11 490 F.C.M.L., M.K., A.M., G.D.T., K.N., F.B., R.P. and M.M. The protocol was initially drafted by M.K., A.M.,  
12  
13 491 G.D.T. and F.C.M.L. Subsequent drafts were reviewed by the included members of DE-PASS: F.B.,  
14  
15 492 R.P., M.M., F.B., S.B., M.B., G.C., A.C., C.C., H.C., A.C., S.C., J.C.S., V.Č., C.C., C.C., E.D., A.D.B., A.D.C.,  
16  
17 493 P.D., R.M.D.T., F.G., E.G.S., M.G., B.G., M.G., G.H., S.H., P.I., H.J., J.J., P.J., A.K., A.K., E.K., F.M., B.M.,  
18  
19 494 T.M., P.J.M., M.M., K.O., A.O.T., F.P., S.P., O.P., Z.P., J.R., P.L.S.R., P.S., M.S., M.S., I.S., H.P.V.D.P.,  
20  
21 495 A.V.H., S.V., C.W., K.W., L.C. and C.M. Revisions were made by M.K., A.M., G.D.T., K.N. and F.C.M.L.  
22  
23 496 All authors have read and agreed to the submitted version of the manuscript.

24  
25  
26  
27  
28  
29  
30  
31  
32  
33  
34  
35  
36  
37  
38  
39  
40  
41  
42  
43  
44  
45  
46  
47  
48  
49  
50  
51  
52  
53  
54  
55  
56  
57  
58  
59  
60

497 **Funding**

498 This article is based upon work from COST Action CA19101 Determinants of Physical Activities in  
499 Settings (DE-PASS), supported by COST (European Cooperation in Science and Technology). The  
500 content of this article reflects only the authors' views and the European Community is not liable for  
501 any use that may be made of the information contained therein.

502 COST (European Cooperation in Science and Technology) is a funding agency for research and  
503 innovation networks. Our Actions help connect research initiatives across Europe and enable scientists  
504 to grow their ideas by sharing them with their peers. This boosts their research, career and innovation.  
505 [www.cost.eu](http://www.cost.eu)

506 **Competing interests**

507 The authors declare no competing interests.

508 **Key dates**

509 The project commenced in June 2021. At the time of submission, the search was complete and data  
510 extraction underway. The expected completion date is October 2022.

511

1  
2  
3 512 **REFERENCES**

- 4 513 1 Guthold R, Stevens GA, Riley LM, *et al.* Global trends in insufficient physical activity among  
5 514 adolescents: a pooled analysis of 298 population-based surveys with 1.6 million participants.  
6 515 *Lancet Child Adolesc Heal* 2020;**4**:23–35. doi:10.1016/S2352-4642(19)30323-2
- 8 516 2 Bull FC, Al-Ansari SS, Biddle S, *et al.* World Health Organization 2020 guidelines on physical  
9 517 activity and sedentary behaviour. *Br J Sports Med* 2020;**54**:1451–62. doi:10.1136/bjsports-  
10 518 2020-102955
- 12 519 3 World Health Organization. Global Status Report On Noncommunicable Diseases 2014. 2014.
- 14 520 4 Biddle SJH, Ciaccioni S, Thomas G, *et al.* Physical activity and mental health in children and  
15 521 adolescents: An updated review of reviews and an analysis of causality. *Psychol Sport Exerc*  
16 522 2019;**42**:146–55. doi:10.1016/j.psychsport.2018.08.011
- 18 523 5 Telama R. Tracking of physical activity from childhood to adulthood: A review. *Obes Facts*  
19 524 2009;**2**:187–95. doi:10.1159/000222244
- 21 525 6 World Health Organization. Global action plan on physical activity 2018–2030: more active  
22 526 people for a healthier world. 2018.
- 24 527 7 Sallis JF, Bull F, Guthold R, *et al.* Progress in physical activity over the Olympic quadrennium.  
25 528 *Lancet* 2016;**388**:1325–36. doi:10.1016/S0140-6736(16)30581-5
- 27 529 8 Bauman AE, Reis RS, Sallis JF, *et al.* Correlates of physical activity: why are some people  
28 530 physically active and others not ? *Lancet* 2012;**380**:258–71. doi:10.1016/S0140-  
29 531 6736(12)60735-1
- 31 532 9 Brug J, van der Ploeg HP, Loyen A, *et al.* Determinants of diet and physical activity (DEDIPAC):  
32 533 A summary of findings. *Int J Behav Nutr Phys Act* 2017;**14**:1–24. doi:10.1186/s12966-017-  
33 534 0609-5
- 35 535 10 Puggina A, Aleksovska K, Buck C, *et al.* Policy determinants of physical activity across the life  
36 536 course: A DEDIPAC' umbrella systematic literature review. *Eur J Public Health* 2018;**28**:105–18.  
37 537 doi:10.1093/eurpub/ckx174
- 39 538 11 Keller C, Ferrer RA, King RB, *et al.* Future directions of the National Institutes of Health Science  
40 539 of Behavior Change Program. *Transl Behav Med* 2021;**11**:1795–801. doi:10.1093/tbm/ibab029
- 42 540 12 HM Treasury. Magenta Book: Central Government guidance on evaluation. 2020.  
43 541 [https://assets.publishing.service.gov.uk/government/uploads/system/uploads/attachment\\_d](https://assets.publishing.service.gov.uk/government/uploads/system/uploads/attachment_data/file/879438/HMT_Magenta_Book.pdf)  
44 542 [ata/file/879438/HMT\\_Magenta\\_Book.pdf](https://assets.publishing.service.gov.uk/government/uploads/system/uploads/attachment_data/file/879438/HMT_Magenta_Book.pdf)
- 46 543 13 Condello G, Puggina A, Aleksovska K, *et al.* Behavioral determinants of physical activity across  
47 544 the life course: A 'DEterminants of Diet and Physical ACTivity' (DEDIPAC) umbrella systematic  
48 545 literature review. *Int J Behav Nutr Phys Act* 2017;**14**. doi:10.1186/s12966-017-0510-2
- 50 546 14 Aleksovska K, Puggina A, Giraldi L, *et al.* Biological determinants of physical activity across the  
51 547 life course: A "determinants of diet and physical activity" (dedipac) umbrella systematic  
52 548 literature review. *Sport Med - Open* 2019;**5**. doi:10.1186/s40798-018-0173-9
- 54 549 15 Cortis C, Puggina A, Pesce C, *et al.* Psychological determinants of physical activity across the  
55 550 life course : A " DEterminants of Diet and Physical ACTivity " ( DEDIPAC ) umbrella systematic  
56 551 literature review. *PLoS One* 2017;**12**:1–25. doi:10.1186/s12966-017-0609-5
- 58 552 16 Jaeschke L, Steinbrecher A, Luzak A, *et al.* Socio-cultural determinants of physical activity  
59 553 across the life course: A 'Determinants of Diet and Physical Activity' (DEDIPAC) umbrella  
60 554 systematic literature review. *Int J Behav Nutr Phys Act* 2017;**14**:1–15. doi:10.1186/s12966-

- 1  
2  
3 555 017-0627-3  
4  
5 556 17 O'Donoghue G, Kennedy A, Puggina A, *et al.* Socio-economic determinants of physical activity  
6 557 across the life course: A 'DEterminants of Diet and Physical ACTivity' (DEDIPAC) umbrella  
7 558 literature review. *Sport Med - Open* 2020;**6**:1–24. doi:10.1186/s40798-020-00291-6  
8  
9 559 18 Martin Ginis KA, van der Ploeg HP, Foster C, *et al.* Participation of people living with  
10 560 disabilities in physical activity: a global perspective. *Lancet* 2021;**398**:443–55.  
11 561 doi:10.1016/S0140-6736(21)01164-8  
12  
13 562 19 Elferink-Gemser MT, te Wierike SC, Visscher C. Multidisciplinary longitudinal studies: A  
14 563 Perspective from the field of sports. In: Ericsson AK, Hoffman R, Kozbelt A, *et al.*, eds. *The*  
15 564 *Cambridge Handbook of Expertise and Expert Performance*. Cambridge: : Cambridge  
16 565 University Press 2018. 271–90.  
17  
18 566 20 Lefebvre C, Glanville J, Briscoe S, *et al.* Chapter 4: Searching for and selecting studies. In:  
19 567 Higgins J, Thomas J, Chandler J, *et al.*, eds. *Cochrane Handbook for Systematic Reviews of*  
20 568 *Interventions version 6.2*. Cochrane 2021. www.training.cochrane.org/handbook  
21  
22 569 21 Dobbins M, Husson H, DeCorby K, *et al.* School-based physical activity programs for promoting  
23 570 physical activity and fitness in children and adolescents aged 6 to 18. *Cochrane Database Syst*  
24 571 *Rev* Published Online First: 2013. doi:10.1002/14651858.CD007651.pub2  
25  
26 572 22 Van Der Horst K, Paw MJCA, Twisk JWR, *et al.* A brief review on correlates of physical activity  
27 573 and sedentariness in youth. *Med Sci Sports Exerc* 2007;**39**:1241–50.  
28 574 doi:10.1249/mss.0b013e318059bf35  
29  
30 575 23 Troiano RP, Pettee Gabriel KK, Welk GJ, *et al.* Reported physical activity and sedentary  
31 576 behavior: Why do you ask? *J Phys Act Health* 2012;**9 Suppl 1**:68–75. doi:10.1123/jpah.9.s1.s68  
32  
33 577 24 Gorzelitz J, Peppard PE, Malecki K, *et al.* Predictors of discordance in self-report versus device-  
34 578 measured physical activity measurement. *Ann Epidemiol* 2018;**28**:427–31.  
35 579 doi:10.1016/j.annepidem.2018.03.016  
36  
37 580 25 Newman L, Baum F, Javanparast S, *et al.* Addressing social determinants of health inequities  
38 581 through settings : a rapid review. *Health Promot Int* 2015;**30**:126–43.  
39 582 doi:10.1093/heapro/dav054  
40  
41 583 26 Rycroft-Malone J, McCormack B, Hutchinson AM, *et al.* Realist synthesis: illustrating the  
42 584 method for implementation research. *Implement Sci* 2012;**7**:1–10. doi:10.1186/1748-5908-7-  
43 585 33  
44  
45 586 27 Shamseer L, Moher D, Clarke M, *et al.* Preferred reporting items for systematic review and  
46 587 meta-analysis protocols (PRISMA-P) 2015: Elaboration and explanation. *BMJ* 2015;**349**:1–25.  
47 588 doi:10.1136/bmj.g7647  
48  
49 589 28 World Health Organization. International classification of functioning, disability and health:  
50 590 ICF. 2001. <https://apps.who.int/iris/handle/10665/42407>  
51  
52 591 29 Tremblay MS, Aubert S, Barnes JD, *et al.* Sedentary Behavior Research Network (SBRN) -  
53 592 Terminology Consensus Project process and outcome. *Int J Behav Nutr Phys Act* 2017;**14**:1–17.  
54 593 doi:10.1186/s12966-017-0525-8  
55  
56 594 30 World Health Organization. *Global recommendations on physical activity for health*. Geneva: :  
57 595 World Health Organisation 2010.  
58  
59 596 31 Craggs C, Corder K, Van Sluijs EMF, *et al.* Determinants of change in physical activity in  
60 597 children and adolescents: A systematic review. *Am J Prev Med* 2011;**40**:645–58.



- 1  
2  
3 598 doi:10.1016/j.amepre.2011.02.025  
4  
5 599 32 Uijtdewilligen L, Nauta J, Singh AS, *et al.* Determinants of physical activity and sedentary  
6 600 behaviour in young people: A review and quality synthesis of prospective studies. *Br J Sports*  
7 601 *Med* 2011;**45**:896–905. doi:10.1136/bjsports-2011-090197  
8  
9 602 33 Clarivate. Endnote version x9. 2020.https://endnote.com/  
10  
11 603 34 Veritas Health Innovation. Covidence systematic review software. www.covidence.org  
12  
13 604 35 Matthew P, Joanne M, Patrick B, *et al.* PRISMA 2020 statement: updated guidelines for  
14 605 reporting systematic reviews and meta analyses. *26th Cochrane Colloquium, Santiago, Chile*  
15 606 Published Online First: 2019. doi:10.1136/bmj.n71  
16  
17 607 36 Slack. Slack is where the future works. www.slack.com  
18  
19 608 37 Higgins J, Deeks J. Selecting Studies and Collecting Data. *Cochrane Handb. Syst. Rev. Interv.*  
20 609 2008;:151–85. doi:https://doi.org/10.1002/9780470712184.ch7  
21  
22 610 38 Wood JA. Methodology for Dealing With Duplicate Study Effects in a Meta-Analysis. 2008;:79–  
23 611 95. doi:10.1177/1094428106296638  
24  
25 612 39 von Elm E, Poglía G, Walder B, *et al.* Different Patterns of Duplicate Publication: An Analysis of  
26 613 Articles Used in Systematic Reviews Erik. *Jama* 2004;**291**:974. doi:10.1001/jama.291.8.974  
27  
28 614 40 Higgins JPT, Altman DG, Gøtzsche PC, *et al.* The Cochrane Collaboration’s tool for assessing  
29 615 risk of bias in randomised trials. *BMJ* 2011;**343**:1–9. doi:10.1136/bmj.d5928  
30  
31 616 41 Sterne JA, Hernán MA, Reeves BC, *et al.* ROBINS-I: A tool for assessing risk of bias in non-  
32 617 randomised studies of interventions. *BMJ* 2016;**355**:4–10. doi:10.1136/bmj.i4919  
33  
34 618 42 National Institute of Health. Quality Assessment Tool for Observational Cohort and Cross-  
35 619 Sectional Studies. 2014.https://www.nhlbi.nih.gov/health-topics/study-quality-assessment-  
36 620 tools  
37  
38 621 43 Kontostoli E, Biddle SJH, Jones AP, *et al.* Age-related change in sedentary behavior during  
39 622 childhood and adolescence : A systematic review and meta-analysis. 2021;:1–11.  
40 623 doi:10.1111/obr.13263  
41  
42 624 44 Schünemann H, Higgins J, Vist G, *et al.* Chapter 14: Completing ‘Summary of findings’ tables  
43 625 and grading the certainty of the evidence. In: Higgins J, Thomas J, Chandler J, *et al.*, eds.  
44 626 *Cochrane Handbook for Systematic Reviews of Interventions version 6.2.* Cochrane 2021.  
45 627 www.training.cochrane.org/handbook  
46  
47 628 45 Jasp Team. JASP (Version 0.14.1). 2020.  
48  
49 629 46 Cohen J. *Statistical power analysis for the behavioral sciences.* 2nd ed. New Jersey: : Lawrence  
50 630 Erlbaum Associates Inc. 1988.  
51  
52 631 47 Julian PT Higgins, Simon G Thompson, Jonathan J Deeks DGA. Measuring inconsistency in  
53 632 meta-analyses. *Br Med J* 2003;**327**:557–60. doi:10.1136/bmj.327.7414.557  
54  
55 633 48 Deeks JJ, Higgins JPT, Altman DG, *et al.* Analysing data and undertaking meta-analyses.  
56 634 *Cochrane Handb. Syst. Rev. Interv.* 2019;:241–84.  
57 635 doi:https://doi.org/10.1002/9781119536604.ch10  
58  
59 636 49 Hinne M, Gronau QF, van den Bergh D, *et al.* A Conceptual Introduction to Bayesian Model  
60 637 Averaging. *Adv Methods Pract Psychol Sci* 2020;**3**:200–15. doi:10.1177/2515245919898657

- 1  
2  
3 638 50 Gronau QF, Heck DW, Berkhout SW, *et al.* A Primer on Bayesian Model-Averaged Meta-  
4 639 Analysis. *Adv Methods Pract Psychol Sci* 2021;**4**. doi:10.1177/25152459211031256  
5  
6 640 51 Bartoš F, Maier M, Wagenmakers E-J, *et al.* No Need to Choose: Robust Bayesian Meta-  
7 641 Analysis with Competing Publication Bias Adjustment Methods. Published Online First: 2021.  
8 642 doi:10.31234/osf.io/kvsp7  
9  
10 643 52 Maier M, Bartoš F, Wagenmakers E-J. Robust Bayesian Meta-Analysis: Addressing Publication  
11 644 Bias with Model-Averaging. *Psychol Methods* doi:10.31234/osf.io/kvsp7  
12  
13 645 53 Carter EC, Schönbrodt FD, Gervais WM, *et al.* Correcting for Bias in Psychology: A Comparison  
14 646 of Meta-Analytic Methods. *Adv Methods Pract Psychol Sci* 2019;**2**:115–44.  
15 647 doi:10.1177/2515245919847196  
16  
17 648 54 Jak S, Li H, Kolbe L, *et al.* Meta-analytic structural equation modeling made easy: A tutorial  
18 649 and web application for one-stage MASEM. *Res Synth Methods* 2021;**12**:590–606.  
19 650 doi:10.1002/jrsm.1498  
20  
21 651  
22  
23  
24  
25  
26  
27  
28  
29  
30  
31  
32  
33  
34  
35  
36  
37  
38  
39  
40  
41  
42  
43  
44  
45  
46  
47  
48  
49  
50  
51  
52  
53  
54  
55  
56  
57  
58  
59  
60

**PRISMA-P (Preferred Reporting Items for Systematic review and Meta-Analysis Protocols) 2015 checklist: recommended items to address in a systematic review protocol\***

| Section and topic                 | Item No | Checklist item                                                                                                                                                                                                                |
|-----------------------------------|---------|-------------------------------------------------------------------------------------------------------------------------------------------------------------------------------------------------------------------------------|
| <b>ADMINISTRATIVE INFORMATION</b> |         |                                                                                                                                                                                                                               |
| Title:                            |         |                                                                                                                                                                                                                               |
| Identification                    | 1a      | Identify the report as a protocol of a systematic review                                                                                                                                                                      |
| Update                            | 1b      | If the protocol is for an update of a previous systematic review, identify as such                                                                                                                                            |
| Registration                      | 2       | If registered, provide the name of the registry (such as PROSPERO) and registration number                                                                                                                                    |
| Authors:                          |         |                                                                                                                                                                                                                               |
| Contact                           | 3a      | Provide name, institutional affiliation, e-mail address of all protocol authors; provide physical mailing address of corresponding author                                                                                     |
| Contributions                     | 3b      | Describe contributions of protocol authors and identify the guarantor of the review                                                                                                                                           |
| Amendments                        | 4       | If the protocol represents an amendment of a previously completed or published protocol, identify as such and list changes; otherwise, state plan for documenting important protocol amendments                               |
| Support:                          |         |                                                                                                                                                                                                                               |
| Sources                           | 5a      | Indicate sources of financial or other support for the review                                                                                                                                                                 |
| Sponsor                           | 5b      | Provide name for the review funder and/or sponsor                                                                                                                                                                             |
| Role of sponsor or funder         | 5c      | Describe roles of funder(s), sponsor(s), and/or institution(s), if any, in developing the protocol                                                                                                                            |
| <b>INTRODUCTION</b>               |         |                                                                                                                                                                                                                               |
| Rationale                         | 6       | Describe the rationale for the review in the context of what is already known                                                                                                                                                 |
| Objectives                        | 7       | Provide an explicit statement of the question(s) the review will address with reference to participants, interventions, comparators, and outcomes (PICO)                                                                      |
| <b>METHODS</b>                    |         |                                                                                                                                                                                                                               |
| Eligibility criteria              | 8       | Specify the study characteristics (such as PICO, study design, setting, time frame) and report characteristics (such as years considered, language, publication status) to be used as criteria for eligibility for the review |
| Information sources               | 9       | Describe all intended information sources (such as electronic databases, contact with study authors, trial registers or other grey literature sources) with planned dates of coverage                                         |
| Search strategy                   | 10      | Present draft of search strategy to be used for at least one electronic database, including planned limits, such that it could be repeated                                                                                    |
| Study records:                    |         |                                                                                                                                                                                                                               |
| Data management                   | 11a     | Describe the mechanism(s) that will be used to manage records and data throughout the review                                                                                                                                  |

1  
2  
3  
4  
5  
6  
7  
8  
9  
10  
11  
12  
13  
14  
15  
16  
17  
18  
19  
20  
21  
22  
23  
24  
25  
26  
27  
28  
29  
30  
31  
32  
33  
34  
35  
36  
37  
38  
39  
40  
41  
42  
43  
44  
45  
46

|                                    |     |                                                                                                                                                                                                                                                  |
|------------------------------------|-----|--------------------------------------------------------------------------------------------------------------------------------------------------------------------------------------------------------------------------------------------------|
| Selection process                  | 11b | State the process that will be used for selecting studies (such as two independent reviewers) through each phase of the review (that is, screening, eligibility and inclusion in meta-analysis)                                                  |
| Data collection process            | 11c | Describe planned method of extracting data from reports (such as piloting forms, done independently, in duplicate), any processes for obtaining and confirming data from investigators                                                           |
| Data items                         | 12  | List and define all variables for which data will be sought (such as PICO items, funding sources), any pre-planned data assumptions and simplifications                                                                                          |
| Outcomes and prioritization        | 13  | List and define all outcomes for which data will be sought, including prioritization of main and additional outcomes, with rationale                                                                                                             |
| Risk of bias in individual studies | 14  | Describe anticipated methods for assessing risk of bias of individual studies, including whether this will be done at the outcome or study level, or both; state how this information will be used in data synthesis                             |
| Data synthesis                     | 15a | Describe criteria under which study data will be quantitatively synthesised                                                                                                                                                                      |
|                                    | 15b | If data are appropriate for quantitative synthesis, describe planned summary measures, methods of handling data and methods of combining data from studies, including any planned exploration of consistency (such as $I^2$ , Kendall's $\tau$ ) |
|                                    | 15c | Describe any proposed additional analyses (such as sensitivity or subgroup analyses, meta-regression)                                                                                                                                            |
|                                    | 15d | If quantitative synthesis is not appropriate, describe the type of summary planned                                                                                                                                                               |
| Meta-bias(es)                      | 16  | Specify any planned assessment of meta-bias(es) (such as publication bias across studies, selective reporting within studies)                                                                                                                    |
| Confidence in cumulative evidence  | 17  | Describe how the strength of the body of evidence will be assessed (such as GRADE)                                                                                                                                                               |

**\* It is strongly recommended that this checklist be read in conjunction with the PRISMA-P Explanation and Elaboration (cite when available) for important clarification on the items. Amendments to a review protocol should be tracked and dated. The copyright for PRISMA-P (including checklist) is held by the PRISMA-P Group and is distributed under a Creative Commons Attribution Licence 4.0.**

*From: Shamseer L, Moher D, Clarke M, Ghersi D, Liberati A, Petticrew M, Shekelle P, Stewart L, PRISMA-P Group. Preferred reporting items for systematic review and meta-analysis protocols (PRISMA-P) 2015: elaboration and explanation. BMJ. 2015 Jan 2;349(jan02 1):g7647.*
